# Supplementary material
Source: publisher figshare collection journal article supplement (https://acs.figshare.com/ndownloader/files/16624070)
Supplement: Supplementary file 1 [file 16624070]

## Sheet: COV
	lipids >=0.1	Median RSD	<0.1	Median RSD
pooled liver	658	7.41	105	10.9
pooled heart	422	9.63	327	10.5
pooled blood	286	16.7	306	23.2
QC	532	10.1	145	12.1
QC spike	632	11.98	34	12.9
F-liver	642	21.28	131	29.4
M-Liver	656	55.1	105	58.3
F-Blood	336	41.8	287	41.7

## Sheet: Table S1
Table S1. Detected 865 lipid species (including 26 CE, 12 CER, 10 DCER, 59 DAG, 26 FFA, 12 HCER, 10 LCER, 12 LPC, 7 LPE, 80 PC, 108 PE, 12 SM, and 491 TAG species) levels (mean ± STD) present in female, male liver extracts, and pooled liver and heart extracts.
Average	F-Liver ± STD (nmol/mL)	M-Liver ± STD (nmol/mL)	P-Liver ± STD (nmol/mL)	P-Heart ± STD (nmol/mL)	QC ± STD (nmol/mL)	QC-Spike ± STD (nmol/mL)	F VS M-liver	pvalue	ratio (F/M)	fdr
CE(12:0)	ND	ND	ND	0.03±0.00	0.23±0.02	0.26±0.01	CE(12:0)	NA	NA
CE(14:0)	0.22±0.05	0.10±0.06	0.20±0.01	0.04±0.00	4.82±0.38	5.90±0.73	CE(14:0)	0.0691482	2.12644	0.994851
CE(14:1)	ND	ND	ND	ND	0.29±0.04	0.40±0.10	CE(14:1)	NA	NA
CE(15:0)	0.05±0.00	0.05±0.03	0.06±0.00	0.02±0.00	1.47±0.12	1.60±0.19	CE(15:0)	0.951184	1.02498	0.994851
CE(16:0)	7.41±1.32	4.39±2.90	7.36±0.37	0.47±0.02	68.72±4.17	98.66±5.69	CE(16:0)	0.206248	1.68767	0.994851
CE(16:1)	8.63±1.48	3.75±2.44	8.03±0.39	0.32±0.02	19.61±1.78	46.92±2.33	CE(16:1)	0.0527349	2.30296	0.994851
CE(17:0)	0.49±0.05	0.22±0.16	0.46±0.04	0.02±0.00	1.69±0.13	1.85±0.18	CE(17:0)	0.0878745	2.23157	0.994851
CE(18:0)	3.26±0.65	1.30±1.03	2.94±0.11	0.08±0.01	7.56±0.74	10.67±0.71	CE(18:0)	0.0597115	2.50227	0.994851
CE(18:1)	48.43±9.10	16.45±13.60	42.05±2.07	0.87±0.11	109.16±9.72	223.46±14.86	CE(18:1)	0.0341142	2.94459	0.883439
CE(18:2)	12.28±0.83	8.57±3.03	12.59±0.42	4.53±0.13	247.41±21.57	543.43±28.25	CE(18:2)	0.15992	1.43357	0.994851
CE(18:3)	0.97±0.07	0.45±0.17	0.88±0.05	0.09±0.00	9.86±1.05	12.05±1.40	CE(18:3)	0.0224016	2.13367	0.883439
CE(18:4)	0.03±0.00	0.02±0.01	0.04±0.00	ND	0.35±0.05	0.47±0.04	CE(18:4)	0.198709	1.99424	0.994851
CE(20:0)	0.07±0.00	0.09±0.04	0.10±0.01	0.05±0.01	2.51±0.32	5.08±0.63	CE(20:0)	0.557687	0.818912	0.994851
CE(20:1)	0.21±0.05	0.15±0.11	0.22±0.01	0.04±0.01	1.24±0.17	2.34±0.47	CE(20:1)	0.471241	1.40316	0.994851
CE(20:2)	0.15±0.03	0.07±0.04	0.14±0.00	0.02±0.00	0.59±0.07	1.67±0.09	CE(20:2)	0.0525565	2.18732	0.994851
CE(20:3)	0.45±0.08	0.40±0.22	0.54±0.01	0.21±0.02	4.55±0.40	33.57±2.65	CE(20:3)	0.738564	1.12798	0.994851
CE(20:4)	4.64±0.46	3.94±2.18	5.41±0.22	2.29±0.12	34.23±3.30	78.91±2.72	CE(20:4)	0.635382	1.17828	0.994851
CE(20:5)	0.49±0.02	0.43±0.17	0.56±0.01	0.22±0.03	4.85±0.53	40.24±0.96	CE(20:5)	0.604343	1.13869	0.994851
CE(22:0)	0.05±0.00	0.05±0.03	0.06±0.01	ND	0.12±0.00	0.62±0.11	CE(22:0)	0.740633	0.885496	0.994851
CE(22:1)	0.04±0.01	0.05±0.02	0.04±0.00	ND	0.18±0.03	0.35±0.04	CE(22:1)	0.553594	0.802105	0.994851
CE(22:2)	ND	ND	ND	0.01±0.00	0.67±0.05	1.02±0.14	CE(22:2)	NA	NA
CE(22:4)	0.04±0.00	0.03±0.01	0.04±0.01	0.02±0.00	0.21±0.01	0.33±0.08	CE(22:4)	0.717105	1.15625	0.994851
CE(22:5)	0.20±0.02	0.21±0.11	0.23±0.00	0.11±0.01	0.47±0.03	1.88±0.11	CE(22:5)	0.864822	0.941371	0.994851
CE(22:6)	3.89±0.43	3.98±2.26	4.80±0.16	1.28±0.07	2.84±0.21	49.25±2.96	CE(22:6)	0.950089	0.976579	0.994851
CE(24:0)	ND	ND	ND	ND	0.18±0.03	0.56±0.09	CE(24:0)	NA	NA
CE(24:1)	ND	ND	ND	ND	0.08±0.01	0.31±0.01	CE(24:1)	NA	NA
CER(14:0)	0.04±0.01	0.03±0.00	0.04±0.00	0.03±0.00	0.03±0.00	1.76±0.04	CER(14:0)	0.131845	1.30345	0.994851
CER(16:0)	1.61±0.08	1.07±0.10	1.30±0.07	0.85±0.10	0.67±0.66	1499.93±70.66	CER(16:0)	0.00238989	1.50011	0.448702
CER(18:0)	0.34±0.04	0.10±0.03	0.23±0.04	0.27±0.01	ND	0.29±0.01	CER(18:0)	0.00148124	3.27721	0.370805
CER(18:1)	ND	ND	ND	ND	ND	ND	CER(18:1)	NA	NA
CER(20:0)	0.23±0.03	0.22±0.07	0.24±0.03	0.66±0.02	0.02±0.00	ND	CER(20:0)	0.817352	1.05423	0.994851
CER(20:1)	0.02±0.00	ND	ND	ND	ND	0.21±0.02	CER(20:1)	NA	NA
CER(22:0)	1.14±0.09	2.24±0.12	1.74±0.08	0.68±0.02	0.16±0.02	0.23±0.01	CER(22:0)	0.00031942	0.511893	0.119942
CER(22:1)	0.17±0.01	0.34±0.05	0.26±0.01	0.05±0.00	ND	ND	CER(22:1)	0.0272177	0.508088	0.883439
CER(24:0)	1.42±0.07	1.82±0.39	1.64±0.08	0.34±0.01	0.51±0.04	0.62±0.03	CER(24:0)	0.212803	0.779733	0.994851
CER(24:1)	2.73±0.19	2.33±0.19	2.57±0.11	0.44±0.02	0.22±0.02	0.31±0.06	CER(24:1)	0.0597792	1.17281	0.994851
CER(26:0)	0.03±0.02	ND	ND	ND	ND	0.20±0.01	CER(26:0)	NA	NA
CER(26:1)	0.02±0.00	ND	ND	ND	ND	ND	CER(26:1)	NA	NA
DAG(12:0/16:0)	0.06±0.01	0.04±0.02	0.04±0.00	0.04±0.01	0.08±0.01	ND	DAG(12:0/16:0)	0.430136	1.47145	0.994851
DAG(12:0/18:0)	ND	ND	ND	ND	0.05±0.01	ND	DAG(12:0/18:0)	NA	NA
DAG(12:0/18:1)	0.18±0.02	0.13±0.07	0.11±0.02	0.11±0.02	0.32±0.04	0.54±0.26	DAG(12:0/18:1)	0.349714	1.36698	0.994851
DAG(12:0/18:2)	0.05±0.02	0.05±0.04	0.04±0.01	0.03±0.00	0.09±0.06	ND	DAG(12:0/18:2)	0.864484	0.888053	0.994851
DAG(14:0/14:0)	ND	ND	ND	0.02±0.00	0.03±0.00	ND	DAG(14:0/14:0)	NA	NA
DAG(14:0/16:0)	0.31±0.07	0.32±0.08	0.31±0.02	0.20±0.02	0.17±0.02	0.69±0.08	DAG(14:0/16:0)	0.907213	0.975582	0.994851
DAG(14:0/16:1)	0.16±0.05	0.16±0.09	0.17±0.01	0.11±0.01	ND	ND	DAG(14:0/16:1)	0.912597	0.956282	0.994851
DAG(14:0/18:1)	1.64±0.32	1.55±0.77	1.69±0.15	0.51±0.02	0.39±0.02	0.78±0.18	DAG(14:0/18:1)	0.86547	1.05781	0.994851
DAG(14:0/18:2)	0.70±0.19	0.95±0.52	0.75±0.05	0.36±0.04	0.11±0.01	0.34±0.03	DAG(14:0/18:2)	0.503442	0.740181	0.994851
DAG(14:0/18:3)	0.04±0.01	0.05±0.01	0.04±0.00	0.02±0.00	ND	ND	DAG(14:0/18:3)	0.4952	0.805133	0.994851
DAG(14:0/20:0)	ND	ND	ND	ND	ND	0.73±0.02	DAG(14:0/20:0)	NA	NA
DAG(14:0/20:4)	ND	ND	ND	ND	ND	ND	DAG(14:0/20:4)	NA	NA
DAG(14:0/22:6)	0.07±0.01	0.08±0.03	0.08±0.00	0.06±0.00	ND	ND	DAG(14:0/22:6)	0.507723	0.83124	0.994851
DAG(14:1/16:0)	0.08±0.00	0.06±0.03	0.06±0.01	0.05±0.02	0.08±0.01	ND	DAG(14:1/16:0)	0.486988	1.2247	0.994851
DAG(14:1/18:1)	0.14±0.02	0.11±0.06	0.11±0.01	0.07±0.04	0.10±0.01	ND	DAG(14:1/18:1)	0.535269	1.24751	0.994851
DAG(15:0/18:1)	0.19±0.02	0.21±0.08	0.21±0.02	0.05±0.01	0.12±0.02	0.74±0.20	DAG(15:0/18:1)	0.712997	0.906215	0.994851
DAG(15:0/18:2)	0.10±0.02	0.15±0.05	0.12±0.02	0.03±0.00	ND	0.49±0.05	DAG(15:0/18:2)	0.246289	0.691672	0.994851
DAG(16:0/16:0)	1.79±0.45	2.10±0.64	2.04±0.09	0.85±0.06	0.57±0.16	239.78±43.77	DAG(16:0/16:0)	0.530984	0.851031	0.994851
DAG(16:0/16:1)	2.39±0.48	3.05±1.40	3.04±0.17	0.81±0.02	0.21±0.03	0.91±0.12	DAG(16:0/16:1)	0.510488	0.785359	0.994851
DAG(16:0/18:0)	1.30±0.26	1.48±0.53	1.49±0.02	0.51±0.08	0.51±0.17	247.60±18.80	DAG(16:0/18:0)	0.639031	0.879173	0.994851
DAG(16:0/18:1)	28.66±4.51	31.59±17.93	35.65±1.76	4.08±0.06	2.11±0.16	321.81±42.72	DAG(16:0/18:1)	0.807243	0.907413	0.994851
DAG(16:0/18:2)	14.02±2.42	19.60±6.64	18.00±0.30	2.96±0.07	0.80±0.11	291.52±24.21	DAG(16:0/18:2)	0.280139	0.715013	0.994851
DAG(16:0/18:3)	0.57±0.13	0.70±0.28	0.70±0.06	0.14±0.01	0.13±0.02	76.44±9.91	DAG(16:0/18:3)	0.507731	0.808551	0.994851
DAG(16:0/20:3)	0.52±0.09	0.67±0.20	0.61±0.09	0.07±0.00	0.05±0.00	3.46±0.57	DAG(16:0/20:3)	0.316689	0.768174	0.994851
DAG(16:0/20:4)	1.57±0.24	1.56±0.52	1.56±0.02	0.12±0.01	0.11±0.04	87.94±14.58	DAG(16:0/20:4)	0.987131	1.0037	0.994851
DAG(16:0/20:5)	0.19±0.01	0.18±0.04	0.23±0.02	0.03±0.01	0.07±0.04	72.46±5.84	DAG(16:0/20:5)	0.776595	1.0451	0.994851
DAG(16:0/22:5)	0.38±0.03	0.75±0.27	0.59±0.01	0.27±0.02	0.05±0.01	3.90±0.22	DAG(16:0/22:5)	0.138671	0.502249	0.994851
DAG(16:0/22:6)	2.62±0.37	3.35±1.39	3.05±0.14	0.73±0.04	0.07±0.04	76.42±9.53	DAG(16:0/22:6)	0.461655	0.781744	0.994851
DAG(16:1/16:1)	0.56±0.08	0.65±0.37	0.64±0.05	0.19±0.01	0.03±0.00	ND	DAG(16:1/16:1)	0.728695	0.868323	0.994851
DAG(16:1/18:0)	0.45±0.06	0.45±0.25	0.50±0.01	0.15±0.02	0.08±0.01	ND	DAG(16:1/18:0)	0.973868	1.01208	0.994851
DAG(16:1/18:1)	9.10±1.31	8.87±5.39	9.68±0.75	1.26±0.01	0.41±0.06	1.06±0.21	DAG(16:1/18:1)	0.950046	1.02523	0.994851
DAG(16:1/18:2)	3.14±0.39	4.05±1.98	3.62±0.06	0.58±0.01	0.10±0.02	0.30±0.06	DAG(16:1/18:2)	0.513333	0.776222	0.994851
DAG(16:1/18:3)	0.21±0.05	0.21±0.11	0.22±0.03	0.05±0.00	0.06±0.02	ND	DAG(16:1/18:3)	0.97817	1.0095	0.994851
DAG(16:1/20:0)	ND	ND	ND	ND	ND	ND	DAG(16:1/20:0)	NA	NA
DAG(16:1/20:2)	0.13±0.00	0.15±0.08	0.15±0.01	0.02±0.00	ND	ND	DAG(16:1/20:2)	0.749839	0.88894	0.994851
DAG(16:1/20:4)	0.14±0.01	0.17±0.06	0.16±0.01	0.02±0.00	ND	ND	DAG(16:1/20:4)	0.439231	0.794043	0.994851
DAG(16:1/22:6)	0.69±0.03	0.68±0.20	0.79±0.05	0.08±0.01	ND	ND	DAG(16:1/22:6)	0.952493	1.01169	0.994851
DAG(18:0/18:1)	5.36±0.86	4.34±2.60	5.43±0.36	1.03±0.01	0.47±0.02	1.03±0.19	DAG(18:0/18:1)	0.574592	1.23463	0.994851
DAG(18:0/18:2)	3.65±0.55	3.43±1.06	3.49±0.10	0.91±0.05	0.16±0.03	0.48±0.07	DAG(18:0/18:2)	0.770416	1.06432	0.994851
DAG(18:0/18:3)	0.20±0.02	0.19±0.06	0.20±0.02	0.05±0.00	0.04±0.01	ND	DAG(18:0/18:3)	0.930774	1.01911	0.994851
DAG(18:0/22:6)	1.19±0.17	0.85±0.26	0.95±0.12	0.44±0.02	ND	0.37±0.05	DAG(18:0/22:6)	0.137289	1.40456	0.994851
DAG(18:1/18:1)	40.71±5.86	32.45±23.08	41.85±2.69	3.64±0.05	1.66±0.12	2.00±0.33	DAG(18:1/18:1)	0.602508	1.25474	0.994851
DAG(18:1/18:2)	23.11±2.66	23.47±10.82	24.41±0.44	3.75±0.13	0.93±0.06	1.06±0.09	DAG(18:1/18:2)	0.960084	0.984708	0.994851
DAG(18:1/20:1)	1.67±0.33	2.33±1.40	2.12±0.09	0.40±0.01	0.06±0.01	ND	DAG(18:1/20:1)	0.505453	0.719218	0.994851
DAG(18:1/20:2)	0.73±0.06	0.80±0.46	0.88±0.04	0.09±0.01	ND	ND	DAG(18:1/20:2)	0.809015	0.908152	0.994851
DAG(18:1/20:3)	1.28±0.04	1.28±0.69	1.38±0.12	0.15±0.01	0.06±0.01	ND	DAG(18:1/20:3)	0.987758	0.994593	0.994851
DAG(18:1/20:4)	1.62±0.11	1.75±0.84	1.82±0.04	0.18±0.01	0.11±0.01	0.16±0.02	DAG(18:1/20:4)	0.80766	0.923152	0.994851
DAG(18:1/20:5)	0.54±0.07	0.49±0.27	0.68±0.03	0.04±0.01	0.05±0.01	ND	DAG(18:1/20:5)	0.785595	1.09899	0.994851
DAG(18:1/22:4)	0.17±0.01	0.29±0.12	0.24±0.01	0.06±0.01	ND	ND	DAG(18:1/22:4)	0.234355	0.595121	0.994851
DAG(18:1/22:5)	0.97±0.16	1.30±0.51	1.27±0.06	0.39±0.01	ND	ND	DAG(18:1/22:5)	0.372627	0.741158	0.994851
DAG(18:1/22:6)	6.72±0.89	5.82±2.10	6.92±0.53	0.93±0.06	0.04±0.01	ND	DAG(18:1/22:6)	0.550397	1.15346	0.994851
DAG(18:2/18:3)	0.61±0.12	0.70±0.32	0.63±0.05	0.11±0.01	0.05±0.02	ND	DAG(18:2/18:3)	0.669676	0.864099	0.994851
DAG(18:2/20:3)	0.53±0.09	0.56±0.20	0.58±0.04	0.14±0.01	ND	ND	DAG(18:2/20:3)	0.825477	0.94572	0.994851
DAG(18:2/20:4)	0.62±0.10	0.83±0.24	0.74±0.04	0.15±0.00	0.05±0.00	ND	DAG(18:2/20:4)	0.263927	0.745483	0.994851
DAG(18:2/20:5)	0.29±0.06	0.29±0.13	0.41±0.01	0.03±0.00	ND	ND	DAG(18:2/20:5)	0.980576	0.992511	0.994851
DAG(18:2/22:4)	0.10±0.02	0.16±0.04	0.13±0.01	0.07±0.01	ND	ND	DAG(18:2/22:4)	0.121227	0.62002	0.994851
DAG(18:2/22:5)	0.55±0.12	0.77±0.21	0.73±0.04	0.42±0.01	ND	ND	DAG(18:2/22:5)	0.229411	0.723327	0.994851
DAG(18:2/22:6)	4.08±0.40	3.65±0.79	4.13±0.23	0.96±0.03	0.02±0.00	ND	DAG(18:2/22:6)	0.467825	1.11706	0.994851
DAG(20:0/20:0)	0.06±0.01	0.06±0.02	0.07±0.00	0.05±0.00	1.76±0.29	3.99±0.19	DAG(20:0/20:0)	0.907576	0.974277	0.994851
DCER(14:0)	ND	ND	ND	ND	ND	1.11±0.23	DCER(14:0)	NA	NA
DCER(16:0)	0.31±0.07	0.26±0.02	0.28±0.01	0.21±0.09	0.39±0.38	851.58±139.42	DCER(16:0)	0.300134	1.21186	0.994851
DCER(18:0)	ND	ND	ND	ND	ND	ND	DCER(18:0)	NA	NA
DCER(20:0)	0.04±0.00	ND	ND	0.06±0.01	ND	ND	DCER(20:0)	NA	NA
DCER(22:0)	0.11±0.02	0.17±0.01	0.13±0.02	0.05±0.01	ND	ND	DCER(22:0)	0.0169344	0.622864	0.7481
DCER(22:1)	0.05±0.01	0.05±0.00	0.05±0.00	ND	ND	ND	DCER(22:1)	0.260408	1.11405	0.994851
DCER(24:0)	0.10±0.01	0.11±0.02	0.10±0.01	0.03±0.00	ND	ND	DCER(24:0)	0.643663	0.929648	0.994851
DCER(24:1)	0.26±0.02	0.24±0.03	0.23±0.01	0.15±0.01	0.15±0.00	ND	DCER(24:1)	0.431791	1.08648	0.994851
DCER(26:0)	ND	ND	ND	ND	0.07±0.01	ND	DCER(26:0)	NA	NA
DCER(26:1)	0.05±0.00	ND	ND	0.06±0.00	0.15±0.05	ND	DCER(26:1)	NA	NA
FFA(12:0)	7.61±3.23	3.38±0.63	2.84±0.05	4.18±0.10	8.12±0.89	9.24±0.89	FFA(12:0)	0.146787	2.25113	0.994851
FFA(14:0)	12.72±1.88	10.39±0.56	9.88±0.63	12.20±0.50	15.94±1.18	18.40±1.71	FFA(14:0)	0.156565	1.22406	0.994851
FFA(14:1)	1.02±0.15	0.86±0.05	0.85±0.06	1.09±0.10	1.77±0.14	1.72±0.27	FFA(14:1)	0.204564	1.18601	0.994851
FFA(15:0)	2.95±0.30	2.81±0.16	2.62±0.18	3.01±0.19	4.22±0.50	4.50±0.34	FFA(15:0)	0.50452	1.05237	0.994851
FFA(16:0)	161.46±8.40	173.48±26.70	181.98±20.64	149.65±2.54	169.21±6.94	169.15±15.64	FFA(16:0)	0.523281	0.930724	0.994851
FFA(16:1)	23.83±1.88	25.56±2.86	25.11±3.26	18.73±0.41	10.61±0.36	10.58±1.62	FFA(16:1)	0.436499	0.932092	0.994851
FFA(17:0)	3.81±0.16	3.74±0.33	3.56±0.30	4.12±0.08	5.80±0.32	5.98±0.51	FFA(17:0)	0.783582	1.01696	0.994851
FFA(18:0)	68.19±3.25	54.96±10.78	57.83±6.23	73.23±0.60	96.94±4.91	90.70±6.03	FFA(18:0)	0.158944	1.24081	0.994851
FFA(18:1)	144.49±18.01	122.07±37.99	147.67±24.65	87.97±2.90	102.56±2.77	93.51±14.48	FFA(18:1)	0.426842	1.18371	0.994851
FFA(18:2)	65.88±8.31	74.54±7.57	72.79±11.83	93.91±1.98	43.72±1.76	41.54±7.24	FFA(18:2)	0.253682	0.883889	0.994851
FFA(18:3)	7.55±1.55	7.67±0.72	7.47±0.99	5.68±0.28	9.69±0.10	10.18±1.61	FFA(18:3)	0.908989	0.983909	0.994851
FFA(18:4)	0.74±0.07	0.69±0.03	0.66±0.04	0.49±0.02	0.56±0.05	0.48±0.07	FFA(18:4)	0.331193	1.07579	0.994851
FFA(20:0)	2.55±0.22	2.80±0.28	2.20±0.25	3.92±0.89	5.38±0.18	5.51±0.48	FFA(20:0)	0.295284	0.910166	0.994851
FFA(20:1)	3.52±0.09	4.46±1.09	4.12±0.55	5.17±0.18	2.88±0.27	2.07±0.22	FFA(20:1)	0.270692	0.788013	0.994851
FFA(20:2)	2.57±0.32	2.60±0.50	2.53±0.38	2.60±0.11	1.52±0.13	1.18±0.16	FFA(20:2)	0.937038	0.988815	0.994851
FFA(20:3)	4.84±0.42	5.03±0.77	4.83±0.72	5.48±0.08	2.31±0.49	1.57±0.19	FFA(20:3)	0.736932	0.962936	0.994851
FFA(20:4)	16.06±1.17	15.77±2.07	13.74±1.67	12.30±0.18	4.41±0.20	3.74±0.62	FFA(20:4)	0.843471	1.01864	0.994851
FFA(20:5)	4.71±0.76	5.36±0.49	4.39±0.44	2.94±0.08	1.52±0.13	1.29±0.15	FFA(20:5)	0.291943	0.878449	0.994851
FFA(22:0)	3.34±0.35	3.01±0.68	2.71±0.42	3.06±0.22	4.72±0.43	2.82±0.23	FFA(22:0)	0.509823	1.11014	0.994851
FFA(22:1)	3.65±0.67	4.04±0.55	3.54±0.62	5.03±0.26	10.85±1.77	4.39±0.65	FFA(22:1)	0.48063	0.903028	0.994851
FFA(22:2)	1.11±0.18	1.06±0.14	0.90±0.13	1.21±0.08	1.88±0.17	1.07±0.14	FFA(22:2)	0.738381	1.04408	0.994851
FFA(22:4)	1.33±0.02	1.79±0.28	1.44±0.12	3.13±0.07	1.11±0.03	0.77±0.10	FFA(22:4)	0.104136	0.74647	0.994851
FFA(22:5)	3.93±0.44	5.65±0.94	4.34±0.48	14.58±0.32	2.85±0.31	2.25±0.37	FFA(22:5)	0.0679852	0.694984	0.994851
FFA(22:6)	24.85±1.98	25.06±5.52	22.78±2.58	33.02±0.44	3.37±0.26	2.65±0.37	FFA(22:6)	0.955704	0.991716	0.994851
FFA(24:0)	0.78±0.06	0.74±0.11	0.58±0.04	1.11±0.07	1.76±0.27	1.21±0.14	FFA(24:0)	0.606321	1.05514	0.994851
FFA(24:1)	2.32±0.17	2.19±0.22	1.85±0.19	3.49±0.38	6.23±1.08	2.49±0.32	FFA(24:1)	0.466879	1.05987	0.994851
HCER(14:0)	ND	ND	ND	ND	ND	1.55±0.13	HCER(14:0)	NA	NA
HCER(16:0)	0.26±0.06	0.23±0.05	0.25±0.02	0.17±0.09	0.53±0.43	1034.25±87.10	HCER(16:0)	0.562346	1.1307	0.994851
HCER(18:0)	0.04±0.01	ND	0.03±0.01	ND	ND	0.46±0.05	HCER(18:0)	NA	NA
HCER(18:1)	ND	ND	ND	ND	ND	0.19±0.03	HCER(18:1)	NA	NA
HCER(20:0)	0.04±0.01	0.04±0.02	0.04±0.01	0.02±0.00	ND	0.14±0.02	HCER(20:0)	0.710585	1.12172	0.994851
HCER(20:1)	ND	ND	ND	ND	ND	0.27±0.02	HCER(20:1)	NA	NA
HCER(22:0)	0.12±0.01	0.16±0.03	0.16±0.02	0.02±0.00	0.09±0.02	0.23±0.04	HCER(22:0)	0.0770166	0.716568	0.994851
HCER(22:1)	0.02±0.00	0.03±0.01	0.03±0.00	ND	ND	0.35±0.06	HCER(22:1)	0.254587	0.63818	0.994851
HCER(24:0)	0.09±0.01	0.11±0.05	0.10±0.01	0.03±0.00	0.13±0.03	0.50±0.03	HCER(24:0)	0.559901	0.796826	0.994851
HCER(24:1)	0.09±0.02	0.09±0.03	0.11±0.01	0.01±0.00	0.11±0.02	0.37±0.04	HCER(24:1)	0.881112	1.03516	0.994851
HCER(26:0)	ND	ND	ND	ND	ND	0.34±0.06	HCER(26:0)	NA	NA
HCER(26:1)	ND	ND	ND	ND	ND	0.32±0.03	HCER(26:1)	NA	NA
LCER(14:0)	ND	ND	ND	ND	ND	7.33±0.20	LCER(14:0)	NA	NA
LCER(16:0)	0.21±0.04	0.26±0.03	0.26±0.03	0.19±0.07	1.11±0.11	451.75±61.23	LCER(16:0)	0.172211	0.818089	0.994851
LCER(18:0)	0.14±0.02	0.18±0.05	0.26±0.06	ND	ND	2.99±1.00	LCER(18:0)	0.24422	0.763548	0.994851
LCER(18:1)	0.29±0.05	0.34±0.13	0.36±0.07	ND	ND	2.22±0.03	LCER(18:1)	0.583309	0.851575	0.994851
LCER(20:0)	ND	ND	ND	ND	ND	1.63±0.39	LCER(20:0)	NA	NA
LCER(20:1)	ND	ND	ND	ND	ND	2.45±0.19	LCER(20:1)	NA	NA
LCER(22:0)	0.20±0.03	ND	0.20±0.03	ND	ND	ND	LCER(22:0)	NA	NA
LCER(22:1)	ND	ND	ND	ND	ND	1.65±0.15	LCER(22:1)	NA	NA
LCER(24:0)	0.17±0.01	ND	ND	ND	ND	ND	LCER(24:0)	NA	NA
LCER(24:1)	ND	ND	ND	ND	ND	2.45±0.20	LCER(24:1)	NA	NA
LPC(16:0)	6.68±1.38	11.35±1.29	8.57±0.72	6.42±1.65	132.57±14.80	461.53±56.57	LPC(16:0)	0.012972	0.588868	0.7481
LPC(18:0)	12.18±1.92	13.08±2.57	13.83±1.31	7.18±1.21	69.94±6.95	58.10±0.00	LPC(18:0)	0.656765	0.931681	0.994851
LPC(18:1)	8.39±1.08	10.96±1.57	12.37±0.39	3.82±0.74	26.22±5.10	28.28±0.94	LPC(18:1)	0.0878796	0.765444	0.994851
LPC(18:2)	13.78±1.99	22.91±7.41	27.06±2.21	3.91±0.67	29.20±5.76	26.65±2.32	LPC(18:2)	0.159203	0.601456	0.994851
LPC(20:0)	1.44±0.47	2.46±0.58	2.28±0.43	2.72±1.12	ND	ND	LPC(20:0)	0.0780939	0.583793	0.994851
LPC(20:1)	1.38±0.31	1.65±0.87	1.50±0.33	ND	ND	ND	LPC(20:1)	0.736858	0.834786	0.994851
LPC(20:2)	1.34±0.42	2.41±0.34	2.99±0.66	ND	ND	ND	LPC(20:2)	0.0290973	0.557729	0.883439
LPC(20:3)	10.95±2.09	19.46±2.57	25.75±1.10	1.84±0.20	15.08±1.46	11.54±0.63	LPC(20:3)	0.0123894	0.56304	0.7481
LPC(20:4)	16.96±2.90	19.40±1.80	27.77±1.73	4.07±0.32	17.36±3.69	12.37±1.28	LPC(20:4)	0.296456	0.874369	0.994851
LPC(20:5)	ND	ND	ND	ND	ND	ND	LPC(20:5)	NA	NA
LPC(22:5)	1.62±0.16	2.95±0.56	3.81±0.27	6.10±0.65	ND	ND	LPC(22:5)	0.0466948	0.548735	0.994851
LPC(22:6)	17.61±2.74	22.61±4.02	30.86±3.86	34.90±5.39	ND	ND	LPC(22:6)	0.159072	0.778923	0.994851
LPE(16:0)	ND	ND	ND	ND	ND	ND	LPE(16:0)	NA	NA
LPE(18:0)	1.42±0.17	2.02±0.32	ND	1.21±0.07	ND	100.10±40.51	LPE(18:0)	0.189745	0.701466	0.994851
LPE(18:1)	1.64±0.04	2.06±0.37	1.99±0.22	1.39±0.31	ND	6.60±1.32	LPE(18:1)	0.19183	0.798048	0.994851
LPE(18:2)	2.82±0.48	4.60±3.40	3.49±0.98	2.08±0.21	ND	10.79±1.61	LPE(18:2)	0.459981	0.612851	0.994851
LPE(20:0)	ND	ND	ND	ND	ND	ND	LPE(20:0)	NA	NA
LPE(20:3)	ND	ND	ND	ND	ND	2.54±0.41	LPE(20:3)	NA	NA
LPE(20:4)	5.09±0.82	6.27±1.84	7.07±0.50	2.38±0.80	ND	3.37±0.76	LPE(20:4)	0.389855	0.81169	0.994851
PC(12:0/18:1)	0.58±0.11	0.61±0.10	0.83±0.07	ND	ND	ND	PC(12:0/18:1)	0.71298	0.946471	0.994851
PC(12:0/18:2)	ND	ND	ND	ND	ND	ND	PC(12:0/18:2)	NA	NA
PC(12:0/18:3)	ND	ND	ND	ND	ND	0.86±0.03	PC(12:0/18:3)	NA	NA
PC(12:0/20:1)	ND	ND	ND	ND	ND	ND	PC(12:0/20:1)	NA	NA
PC(14:0/18:1)	0.31±0.04	0.33±0.02	0.45±0.08	0.24±0.07	0.44±0.15	0.83±0.13	PC(14:0/18:1)	0.649328	0.956367	0.994851
PC(14:0/18:2)	0.34±0.03	0.41±0.07	0.43±0.05	0.30±0.11	0.49±0.03	0.88±0.11	PC(14:0/18:2)	0.206205	0.815984	0.994851
PC(14:0/20:3)	ND	ND	ND	ND	ND	ND	PC(14:0/20:3)	NA	NA
PC(14:0/20:4)	0.49±0.00	0.50±0.05	0.57±0.19	ND	ND	1.25±0.50	PC(14:0/20:4)	0.94722	0.99559	0.994851
PC(14:0/22:6)	0.81±0.16	0.87±0.13	0.86±0.02	2.03±0.56	ND	ND	PC(14:0/22:6)	0.706048	0.926444	0.994851
PC(15:0/18:1)	ND	ND	ND	ND	ND	ND	PC(15:0/18:1)	NA	NA
PC(15:0/18:2)	ND	ND	ND	ND	ND	0.57±0.22	PC(15:0/18:2)	NA	NA
PC(15:0/20:4)	ND	ND	ND	ND	ND	ND	PC(15:0/20:4)	NA	NA
PC(15:0/22:6)	ND	ND	ND	0.34±0.02	ND	ND	PC(15:0/22:6)	NA	NA
PC(16:0/12:0)	1.19±0.14	1.33±0.39	1.75±0.25	0.19±0.05	ND	ND	PC(16:0/12:0)	0.628778	0.901491	0.994851
PC(16:0/14:0)	ND	ND	ND	0.21±0.02	ND	ND	PC(16:0/14:0)	NA	NA
PC(16:0/16:0)	10.36±0.53	13.54±3.52	14.48±2.31	10.16±0.90	8.60±0.27	29.06±1.64	PC(16:0/16:0)	0.256528	0.765188	0.994851
PC(16:0/16:1)	2.28±0.15	3.62±1.31	3.32±0.52	0.78±0.09	1.62±0.18	60.60±4.74	PC(16:0/16:1)	0.216965	0.628899	0.994851
PC(16:0/18:0)	12.46±1.06	12.34±0.60	15.31±1.50	4.57±0.33	9.24±0.30	10.53±0.71	PC(16:0/18:0)	0.871774	1.00999	0.994851
PC(16:0/18:1)	38.87±4.19	50.94±3.36	57.61±6.03	22.19±1.05	36.59±5.21	264.06±21.01	PC(16:0/18:1)	0.019246	0.763138	0.802984
PC(16:0/18:2)	74.57±4.62	113.62±28.01	111.69±7.95	23.11±0.96	84.45±11.56	382.65±41.10	PC(16:0/18:2)	0.133599	0.656327	0.994851
PC(16:0/18:3)	1.38±0.04	1.97±0.79	2.07±0.50	0.39±0.04	1.45±0.19	80.13±16.87	PC(16:0/18:3)	0.322062	0.699926	0.994851
PC(16:0/20:1)	0.44±0.09	0.75±0.08	0.76±0.08	0.46±0.07	0.44±0.11	1.09±0.24	PC(16:0/20:1)	0.0112786	0.591107	0.7481
PC(16:0/20:2)	2.16±0.28	3.22±0.12	3.50±0.24	1.00±0.11	1.60±0.41	4.73±0.30	PC(16:0/20:2)	0.0125584	0.672399	0.7481
PC(16:0/20:3)	20.88±1.69	31.40±3.31	30.56±1.93	3.09±0.29	16.16±0.99	108.41±12.36	PC(16:0/20:3)	0.0165446	0.66509	0.7481
PC(16:0/20:4)	142.78±3.89	152.04±24.90	178.85±19.26	38.65±0.52	51.48±5.54	456.11±73.06	PC(16:0/20:4)	0.586909	0.939073	0.994851
PC(16:0/20:5)	12.80±1.00	13.77±0.89	16.25±1.72	1.90±0.70	6.06±1.39	95.15±15.79	PC(16:0/20:5)	0.280017	0.929881	0.994851
PC(16:0/22:4)	0.85±0.04	1.42±0.19	1.42±0.23	2.13±0.27	1.46±0.04	148.48±20.09	PC(16:0/22:4)	0.0311336	0.602812	0.883439
PC(16:0/22:5)	8.00±0.26	12.01±1.89	12.56±0.80	32.34±4.28	6.85±1.14	156.29±16.44	PC(16:0/22:5)	0.0645405	0.666232	0.994851
PC(16:0/22:6)	166.67±16.94	192.03±16.60	215.28±11.53	297.16±33.67	15.83±2.69	246.10±62.09	PC(16:0/22:6)	0.1377	0.867943	0.994851
PC(17:0/14:1)	ND	ND	ND	0.61±0.11	ND	ND	PC(17:0/14:1)	NA	NA
PC(17:0/16:1)	ND	0.30±0.02	0.32±0.06	0.50±0.09	ND	ND	PC(17:0/16:1)	NA	NA
PC(17:0/18:1)	0.30±0.04	0.36±0.04	0.41±0.09	0.18±0.02	0.52±0.08	0.44±0.07	PC(17:0/18:1)	0.150191	0.835131	0.994851
PC(17:0/18:2)	0.82±0.05	0.84±0.16	1.09±0.07	0.32±0.06	0.80±0.17	0.90±0.11	PC(17:0/18:2)	0.876303	0.979555	0.994851
PC(17:0/20:3)	0.42±0.14	0.59±0.09	0.65±0.24	0.67±0.21	ND	ND	PC(17:0/20:3)	0.163738	0.71287	0.994851
PC(17:0/20:4)	1.42±0.03	1.35±0.40	1.76±0.29	1.29±0.18	0.65±0.13	ND	PC(17:0/20:4)	0.792799	1.05161	0.994851
PC(17:0/22:5)	ND	ND	ND	0.22±0.04	ND	ND	PC(17:0/22:5)	NA	NA
PC(17:0/22:6)	0.75±0.13	0.81±0.20	0.77±0.23	1.61±0.16	ND	ND	PC(17:0/22:6)	0.719882	0.933027	0.994851
PC(18:0/12:0)	1.21±0.23	1.36±0.32	1.59±0.12	0.45±0.12	ND	26.71±9.67	PC(18:0/12:0)	0.554031	0.89118	0.994851
PC(18:0/16:1)	0.79±0.10	0.94±0.23	1.13±0.16	0.23±0.03	ND	0.63±0.29	PC(18:0/16:1)	0.396215	0.841901	0.994851
PC(18:0/18:0)	1.21±0.11	1.20±0.41	1.45±0.09	1.67±0.16	0.53±0.14	1.15±0.57	PC(18:0/18:0)	0.99355	1.00183	0.996203
PC(18:0/18:1)	13.88±1.88	10.76±2.71	16.06±1.98	7.72±0.68	8.01±1.16	12.59±1.31	PC(18:0/18:1)	0.18506	1.29007	0.994851
PC(18:0/18:2)	86.61±10.84	80.17±10.21	105.03±8.73	14.18±0.76	48.84±6.91	71.47±5.35	PC(18:0/18:2)	0.495709	1.08031	0.994851
PC(18:0/18:3)	0.86±0.10	0.88±0.17	1.00±0.20	ND	0.80±0.10	1.32±0.24	PC(18:0/18:3)	0.870908	0.977066	0.994851
PC(18:0/20:0)	0.26±0.08	0.21±0.04	0.28±0.03	0.47±0.09	ND	0.23±0.01	PC(18:0/20:0)	0.45005	1.22293	0.994851
PC(18:0/20:1)	0.29±0.10	0.33±0.13	0.36±0.04	0.26±0.01	ND	ND	PC(18:0/20:1)	0.697395	0.880316	0.994851
PC(18:0/20:2)	2.01±0.51	1.98±0.59	2.66±0.25	0.58±0.10	0.87±0.24	1.23±0.22	PC(18:0/20:2)	0.96117	1.01175	0.994851
PC(18:0/20:3)	22.39±4.50	21.89±8.89	26.70±1.03	2.68±0.26	8.01±0.27	13.07±0.83	PC(18:0/20:3)	0.935683	1.02305	0.994851
PC(18:0/20:4)	168.68±15.98	119.06±54.11	185.15±18.28	40.96±0.29	30.31±4.24	41.91±4.35	PC(18:0/20:4)	0.249093	1.41675	0.994851
PC(18:0/20:5)	11.24±2.50	8.47±2.08	11.88±1.35	1.34±0.52	3.50±0.44	4.98±0.49	PC(18:0/20:5)	0.216007	1.32694	0.994851
PC(18:0/22:4)	0.67±0.11	0.71±0.17	1.03±0.09	1.12±0.20	0.91±0.12	1.34±0.37	PC(18:0/22:4)	0.744943	0.941301	0.994851
PC(18:0/22:5)	4.32±0.14	4.65±1.18	5.95±0.68	20.28±0.64	2.25±0.25	3.58±0.14	PC(18:0/22:5)	0.681457	0.929881	0.994851
PC(18:0/22:6)	85.59±5.30	64.45±10.38	96.15±10.24	204.06±18.10	5.90±1.90	8.26±1.69	PC(18:0/22:6)	0.0521611	1.32802	0.994851
PC(18:1/16:1)	3.51±0.72	3.18±0.25	4.36±0.46	1.26±0.03	0.93±0.11	1.71±0.59	PC(18:1/16:1)	0.521353	1.10245	0.994851
PC(18:1/18:1)	5.65±0.72	4.02±0.84	6.35±0.66	1.69±0.14	2.65±0.24	5.11±0.29	PC(18:1/18:1)	0.0641626	1.40764	0.994851
PC(18:1/18:2)	28.00±1.74	21.76±2.43	32.65±3.52	5.47±0.28	13.07±1.50	22.16±1.57	PC(18:1/18:2)	0.0266283	1.28666	0.883439
PC(18:1/18:3)	0.40±0.13	0.40±0.12	0.43±0.06	ND	ND	0.48±0.03	PC(18:1/18:3)	0.976396	0.992014	0.994851
PC(18:1/20:1)	0.27±0.02	0.38±0.07	0.41±0.06	0.15±0.06	ND	ND	PC(18:1/20:1)	0.081168	0.703272	0.994851
PC(18:1/20:2)	0.82±0.28	0.88±0.15	1.07±0.14	ND	ND	0.51±0.06	PC(18:1/20:2)	0.765938	0.932617	0.994851
PC(18:1/20:3)	6.88±1.71	5.96±1.83	8.56±0.43	0.51±0.04	1.78±0.37	2.93±0.31	PC(18:1/20:3)	0.561168	1.15323	0.994851
PC(18:1/20:4)	49.60±3.83	32.14±10.46	53.46±3.66	5.76±0.43	5.83±1.02	9.80±0.97	PC(18:1/20:4)	0.0879124	1.54329	0.994851
PC(18:1/20:5)	4.76±0.89	3.33±0.70	4.48±1.08	ND	ND	1.96±0.09	PC(18:1/20:5)	0.0972976	1.43268	0.994851
PC(18:1/22:4)	ND	ND	ND	ND	ND	ND	PC(18:1/22:4)	NA	NA
PC(18:1/22:5)	1.89±0.11	1.84±0.15	2.52±0.25	2.28±0.14	ND	ND	PC(18:1/22:5)	0.678061	1.02571	0.994851
PC(18:1/22:6)	36.43±1.24	27.19±3.47	40.86±2.06	19.82±4.07	ND	1.73±0.35	PC(18:1/22:6)	0.0324576	1.33994	0.883439
PC(18:2/16:1)	3.79±0.55	4.00±1.07	4.79±0.34	2.54±0.39	1.20±0.21	2.30±0.63	PC(18:2/16:1)	0.778348	0.946678	0.994851
PC(18:2/18:2)	4.51±0.29	4.40±0.53	5.49±0.64	1.74±0.16	3.16±0.63	6.27±0.47	PC(18:2/18:2)	0.784826	1.02344	0.994851
PC(18:2/18:3)	0.32±0.05	0.29±0.11	ND	ND	ND	ND	PC(18:2/18:3)	0.809612	1.08213	0.994851
PC(18:2/20:1)	0.49±0.03	0.70±0.14	0.82±0.08	0.24±0.03	ND	ND	PC(18:2/20:1)	0.12234	0.703649	0.994851
PC(18:2/20:2)	0.59±0.06	0.66±0.12	0.81±0.07	0.27±0.03	ND	ND	PC(18:2/20:2)	0.39871	0.887342	0.994851
PC(18:2/20:3)	1.72±0.12	2.12±0.42	2.54±0.31	0.44±0.06	0.58±0.16	0.91±0.22	PC(18:2/20:3)	0.231663	0.809989	0.994851
PC(18:2/20:4)	12.29±0.42	10.34±1.89	14.67±2.24	3.65±0.96	1.96±0.39	3.83±0.40	PC(18:2/20:4)	0.212946	1.18812	0.994851
PC(18:2/20:5)	1.39±0.32	1.29±0.12	1.62±0.29	ND	ND	ND	PC(18:2/20:5)	0.652713	1.07657	0.994851
PC(18:2/22:5)	0.43±0.11	0.48±0.05	ND	2.71±0.29	ND	ND	PC(18:2/22:5)	0.58502	0.906382	0.994851
PC(18:2/22:6)	7.49±1.20	6.58±0.30	8.45±0.12	35.13±4.94	ND	ND	PC(18:2/22:6)	0.317334	1.1384	0.994851
PC(20:0/18:1)	ND	0.25±0.02	0.25±0.06	0.17±0.12	ND	ND	PC(20:0/18:1)	NA	NA
PC(20:0/18:2)	0.32±0.05	1.67±0.40	1.15±0.07	0.24±0.04	0.53±0.15	0.60±0.12	PC(20:0/18:2)	0.0264697	0.192321	0.883439
PC(20:0/20:3)	ND	0.26±0.04	ND	ND	ND	ND	PC(20:0/20:3)	NA	NA
PC(20:0/20:4)	0.56±0.12	1.54±0.24	1.31±0.28	0.42±0.06	ND	0.88±0.04	PC(20:0/20:4)	0.0100407	0.363707	0.7481
PC(20:0/22:6)	ND	1.34±0.14	1.10±0.23	1.88±0.19	ND	ND	PC(20:0/22:6)	NA	NA
PE(14:0/18:1)	ND	ND	ND	ND	ND	ND	PE(14:0/18:1)	NA	NA
PE(14:0/18:2)	ND	ND	ND	ND	ND	ND	PE(14:0/18:2)	NA	NA
PE(15:0/22:6)	ND	ND	ND	ND	ND	ND	PE(15:0/22:6)	NA	NA
PE(16:0/14:0)	ND	ND	ND	ND	ND	ND	PE(16:0/14:0)	NA	NA
PE(16:0/16:0)	ND	ND	ND	ND	ND	ND	PE(16:0/16:0)	NA	NA
PE(16:0/18:1)	0.73±0.09	0.90±0.15	0.83±0.11	0.30±0.05	0.30±0.05	0.46±0.21	PE(16:0/18:1)	0.180602	0.809882	0.994851
PE(16:0/18:2)	2.47±0.03	3.62±1.31	3.11±0.35	0.23±0.02	0.41±0.03	0.62±0.06	PE(16:0/18:2)	0.266518	0.682016	0.994851
PE(16:0/20:1)	0.12±0.02	0.14±0.03	0.16±0.01	ND	ND	ND	PE(16:0/20:1)	0.383275	0.848441	0.994851
PE(16:0/20:2)	0.15±0.00	0.18±0.08	0.17±0.03	ND	ND	ND	PE(16:0/20:2)	0.574526	0.819712	0.994851
PE(16:0/20:3)	0.85±0.09	1.44±0.18	1.53±0.15	0.13±0.01	ND	ND	PE(16:0/20:3)	0.0148058	0.586176	0.7481
PE(16:0/20:4)	13.15±1.07	14.81±0.21	16.20±2.05	1.84±0.19	ND	0.73±0.12	PE(16:0/20:4)	0.110648	0.888169	0.994851
PE(16:0/20:5)	0.92±0.12	1.23±0.25	1.20±0.21	ND	ND	ND	PE(16:0/20:5)	0.149876	0.746702	0.994851
PE(16:0/22:4)	0.31±0.04	0.33±0.05	0.40±0.06	0.38±0.05	ND	ND	PE(16:0/22:4)	0.528097	0.925028	0.994851
PE(16:0/22:5)	3.90±0.81	4.11±1.50	4.23±0.64	3.63±0.98	ND	ND	PE(16:0/22:5)	0.845787	0.949362	0.994851
PE(16:0/22:6)	97.83±5.47	114.21±11.65	136.28±22.60	58.10±7.13	0.76±0.29	0.99±0.18	PE(16:0/22:6)	0.119739	0.856599	0.994851
PE(17:0/20:3)	ND	ND	ND	ND	ND	ND	PE(17:0/20:3)	NA	NA
PE(17:0/20:4)	0.53±0.11	0.46±0.13	0.61±0.02	ND	ND	ND	PE(17:0/20:4)	0.544422	1.13907	0.994851
PE(17:0/22:5)	ND	ND	ND	0.32±0.11	ND	ND	PE(17:0/22:5)	NA	NA
PE(17:0/22:6)	1.15±0.31	0.87±0.23	1.26±0.22	2.62±0.51	ND	ND	PE(17:0/22:6)	0.273001	1.33177	0.994851
PE(18:0/16:0)	0.07±0.02	ND	ND	0.08±0.01	ND	ND	PE(18:0/16:0)	NA	NA
PE(18:0/16:1)	ND	ND	0.07±0.00	ND	0.17±0.05	ND	PE(18:0/16:1)	NA	NA
PE(18:0/18:0)	0.25±0.03	0.23±0.03	0.29±0.05	3.34±0.26	ND	5.59±0.14	PE(18:0/18:0)	0.424498	1.08874	0.994851
PE(18:0/18:1)	1.26±0.15	1.21±0.26	1.32±0.04	0.92±0.01	0.62±0.09	262.15±12.27	PE(18:0/18:1)	0.79439	1.04113	0.994851
PE(18:0/18:2)	5.90±0.49	9.09±2.42	8.30±0.84	1.34±0.06	2.08±0.44	349.43±51.09	PE(18:0/18:2)	0.145705	0.649517	0.994851
PE(18:0/18:3)	0.12±0.04	ND	0.11±0.01	ND	ND	39.07±2.48	PE(18:0/18:3)	NA	NA
PE(18:0/20:1)	0.20±0.03	0.35±0.11	0.29±0.03	0.13±0.00	ND	3.89±0.96	PE(18:0/20:1)	0.13281	0.579501	0.994851
PE(18:0/20:2)	0.32±0.08	0.39±0.04	0.37±0.05	0.06±0.02	ND	3.45±1.28	PE(18:0/20:2)	0.308698	0.830695	0.994851
PE(18:0/20:3)	3.34±0.24	5.03±1.07	5.73±1.18	1.31±0.19	0.24±0.13	81.59±15.48	PE(18:0/20:3)	0.105412	0.664103	0.994851
PE(18:0/20:4)	71.23±9.02	71.55±14.54	82.73±6.66	37.28±5.88	1.96±0.46	231.60±18.94	PE(18:0/20:4)	0.975467	0.995428	0.994851
PE(18:0/20:5)	4.12±0.61	4.33±0.89	4.75±0.49	0.93±0.22	ND	ND	PE(18:0/20:5)	0.760808	0.952562	0.994851
PE(18:0/22:2)	ND	ND	ND	ND	ND	ND	PE(18:0/22:2)	NA	NA
PE(18:0/22:4)	1.26±0.40	1.10±0.21	1.19±0.13	1.28±0.21	ND	4.58±0.67	PE(18:0/22:4)	0.583349	1.14478	0.994851
PE(18:0/22:5)	3.63±0.60	3.17±0.78	3.53±0.58	10.61±2.57	ND	ND	PE(18:0/22:5)	0.469588	1.14432	0.994851
PE(18:0/22:6)	56.58±4.34	64.49±3.38	70.80±11.79	182.89±24.53	0.77±0.17	281.80±76.74	PE(18:0/22:6)	0.0712941	0.877368	0.994851
PE(18:1/14:1)	ND	ND	ND	ND	ND	ND	PE(18:1/14:1)	NA	NA
PE(18:1/16:1)	0.14±0.04	0.13±0.01	0.16±0.01	ND	ND	ND	PE(18:1/16:1)	0.596144	1.10628	0.994851
PE(18:1/18:1)	0.68±0.08	0.61±0.08	0.74±0.04	0.18±0.01	0.27±0.08	0.71±0.15	PE(18:1/18:1)	0.374245	1.11075	0.994851
PE(18:1/18:2)	5.07±0.60	5.55±1.11	5.92±0.74	0.40±0.06	0.71±0.25	1.20±0.03	PE(18:1/18:2)	0.556597	0.913651	0.994851
PE(18:1/18:3)	ND	0.10±0.01	0.17±0.07	ND	ND	ND	PE(18:1/18:3)	NA	NA
PE(18:1/20:1)	0.20±0.09	0.32±0.04	0.26±0.04	ND	ND	ND	PE(18:1/20:1)	0.150184	0.629606	0.994851
PE(18:1/20:2)	0.26±0.05	0.23±0.01	0.28±0.08	ND	ND	ND	PE(18:1/20:2)	0.366979	1.13203	0.994851
PE(18:1/20:3)	1.64±0.14	2.13±0.35	2.46±0.52	0.27±0.04	ND	ND	PE(18:1/20:3)	0.120684	0.770597	0.994851
PE(18:1/20:4)	26.20±3.98	22.71±4.85	29.81±2.95	5.16±0.93	ND	0.48±0.25	PE(18:1/20:4)	0.391193	1.15377	0.994851
PE(18:1/20:5)	1.91±0.27	1.93±0.24	2.50±0.35	0.25±0.15	ND	ND	PE(18:1/20:5)	0.960256	0.994288	0.994851
PE(18:1/22:1)	ND	0.10±0.01	ND	ND	ND	ND	PE(18:1/22:1)	NA	NA
PE(18:1/22:2)	ND	ND	ND	ND	ND	ND	PE(18:1/22:2)	NA	NA
PE(18:1/22:4)	0.25±0.06	0.23±0.04	0.31±0.03	0.37±0.09	ND	ND	PE(18:1/22:4)	0.749528	1.06381	0.994851
PE(18:1/22:5)	1.78±0.35	1.33±0.12	1.63±0.35	2.54±0.41	ND	ND	PE(18:1/22:5)	0.141145	1.3398	0.994851
PE(18:1/22:6)	38.12±2.12	35.35±2.04	49.22±9.06	40.89±5.56	ND	ND	PE(18:1/22:6)	0.178615	1.07834	0.994851
PE(18:2/16:1)	0.24±0.04	0.29±0.14	0.23±0.06	0.08±0.01	ND	ND	PE(18:2/16:1)	0.597044	0.822245	0.994851
PE(18:2/18:2)	0.22±0.03	0.27±0.08	0.24±0.04	0.13±0.01	ND	0.45±0.10	PE(18:2/18:2)	0.40402	0.82474	0.994851
PE(18:2/20:1)	ND	0.14±0.02	0.11±0.02	0.08±0.01	ND	ND	PE(18:2/20:1)	NA	NA
PE(18:2/20:2)	ND	ND	0.09±0.01	ND	ND	ND	PE(18:2/20:2)	NA	NA
PE(18:2/20:3)	0.14±0.01	0.14±0.01	0.15±0.08	0.13±0.03	ND	ND	PE(18:2/20:3)	0.848453	0.986826	0.994851
PE(18:2/20:4)	1.01±0.05	0.85±0.02	1.08±0.17	0.58±0.14	ND	ND	PE(18:2/20:4)	0.0143243	1.19011	0.7481
PE(18:2/20:5)	ND	ND	ND	ND	ND	ND	PE(18:2/20:5)	NA	NA
PE(18:2/22:4)	ND	ND	ND	0.17±0.01	ND	ND	PE(18:2/22:4)	NA	NA
PE(18:2/22:5)	0.16±0.06	ND	ND	1.10±0.28	ND	ND	PE(18:2/22:5)	NA	NA
PE(18:2/22:6)	1.30±0.11	1.37±0.16	1.64±0.23	10.68±1.65	ND	ND	PE(18:2/22:6)	0.583922	0.951637	0.994851
PE(O-16:0/16:0)	ND	ND	ND	ND	ND	ND	PE(O-16:0/16:0)	NA	NA
PE(O-16:0/18:1)	ND	ND	0.09±0.00	ND	0.21±0.01	ND	PE(O-16:0/18:1)	NA	NA
PE(O-16:0/18:2)	ND	ND	ND	ND	ND	ND	PE(O-16:0/18:2)	NA	NA
PE(O-16:0/20:4)	0.15±0.04	ND	0.15±0.02	ND	ND	ND	PE(O-16:0/20:4)	NA	NA
PE(O-16:0/22:4)	0.22±0.04	0.12±0.02	0.28±0.02	0.22±0.06	ND	ND	PE(O-16:0/22:4)	0.0261406	1.85028	0.883439
PE(O-16:0/22:5)	0.22±0.02	0.19±0.02	0.22±0.04	0.86±0.24	ND	ND	PE(O-16:0/22:5)	0.187058	1.13101	0.994851
PE(O-16:0/22:6)	0.67±0.22	0.68±0.08	0.59±0.01	3.13±0.43	ND	ND	PE(O-16:0/22:6)	0.933658	0.981931	0.994851
PE(O-18:0/16:0)	ND	ND	ND	ND	ND	ND	PE(O-18:0/16:0)	NA	NA
PE(O-18:0/18:0)	ND	ND	ND	ND	ND	ND	PE(O-18:0/18:0)	NA	NA
PE(O-18:0/18:1)	0.09±0.01	ND	0.11±0.03	ND	ND	ND	PE(O-18:0/18:1)	NA	NA
PE(O-18:0/18:2)	0.20±0.04	0.24±0.09	0.25±0.04	0.09±0.02	ND	ND	PE(O-18:0/18:2)	0.523438	0.837003	0.994851
PE(O-18:0/20:3)	0.09±0.01	ND	ND	ND	ND	ND	PE(O-18:0/20:3)	NA	NA
PE(O-18:0/20:4)	0.88±0.04	0.86±0.08	0.91±0.14	0.59±0.18	ND	0.43±0.02	PE(O-18:0/20:4)	0.788276	1.01731	0.994851
PE(O-18:0/20:5)	ND	ND	ND	ND	ND	ND	PE(O-18:0/20:5)	NA	NA
PE(O-18:0/22:4)	ND	ND	ND	0.21±0.01	ND	ND	PE(O-18:0/22:4)	NA	NA
PE(O-18:0/22:5)	0.17±0.02	0.15±0.06	0.22±0.07	0.70±0.16	ND	ND	PE(O-18:0/22:5)	0.65474	1.12965	0.994851
PE(O-18:0/22:6)	1.39±0.11	1.78±0.16	2.24±0.60	5.49±0.78	ND	ND	PE(O-18:0/22:6)	0.030785	0.778601	0.883439
PE(P-14:0/18:0)	ND	ND	ND	ND	ND	0.36±0.11	PE(P-14:0/18:0)	NA	NA
PE(P-14:1/18:1)	ND	ND	ND	ND	ND	ND	PE(P-14:1/18:1)	NA	NA
PE(P-16:0/16:0)	ND	ND	ND	ND	0.17±0.03	ND	PE(P-16:0/16:0)	NA	NA
PE(P-16:0/18:0)	ND	ND	ND	ND	ND	0.31±0.14	PE(P-16:0/18:0)	NA	NA
PE(P-16:0/18:1)	0.15±0.04	0.13±0.04	ND	0.20±0.03	0.29±0.07	ND	PE(P-16:0/18:1)	0.643607	1.12575	0.994851
PE(P-16:0/18:2)	ND	0.12±0.01	ND	0.21±0.04	ND	ND	PE(P-16:0/18:2)	NA	NA
PE(P-16:0/20:3)	0.12±0.04	0.14±0.01	0.16±0.04	0.18±0.03	ND	ND	PE(P-16:0/20:3)	0.629324	0.866361	0.994851
PE(P-16:0/20:4)	1.27±0.30	1.07±0.13	1.24±0.14	1.96±0.43	0.69±0.15	0.79±0.25	PE(P-16:0/20:4)	0.377788	1.18802	0.994851
PE(P-16:0/20:5)	ND	ND	ND	0.24±0.02	ND	ND	PE(P-16:0/20:5)	NA	NA
PE(P-16:0/22:4)	0.81±0.12	0.71±0.06	0.98±0.11	1.34±0.35	ND	ND	PE(P-16:0/22:4)	0.320078	1.12956	0.994851
PE(P-16:0/22:5)	0.95±0.11	0.70±0.05	0.93±0.21	6.19±1.36	ND	ND	PE(P-16:0/22:5)	0.0404079	1.35614	0.994851
PE(P-16:0/22:6)	2.12±0.23	2.25±0.09	2.68±0.46	39.87±6.79	0.81±0.12	1.19±0.30	PE(P-16:0/22:6)	0.429585	0.940894	0.994851
PE(P-16:1/18:1)	ND	ND	ND	ND	ND	ND	PE(P-16:1/18:1)	NA	NA
PE(P-18:0/16:0)	ND	ND	ND	ND	ND	ND	PE(P-18:0/16:0)	NA	NA
PE(P-18:0/18:1)	0.10±0.03	ND	ND	0.12±0.01	0.26±0.03	ND	PE(P-18:0/18:1)	NA	NA
PE(P-18:0/18:2)	0.22±0.02	0.23±0.04	0.22±0.05	0.40±0.04	0.57±0.12	0.98±0.08	PE(P-18:0/18:2)	0.571583	0.931969	0.994851
PE(P-18:0/20:3)	0.10±0.04	0.11±0.03	0.11±0.02	0.16±0.04	0.23±0.08	ND	PE(P-18:0/20:3)	0.784242	0.908098	0.994851
PE(P-18:0/20:4)	1.53±0.13	1.10±0.07	1.30±0.08	2.62±0.55	1.81±0.60	2.17±0.40	PE(P-18:0/20:4)	0.0119926	1.38971	0.7481
PE(P-18:0/20:5)	ND	ND	ND	0.39±0.04	ND	ND	PE(P-18:0/20:5)	NA	NA
PE(P-18:0/22:4)	0.43±0.04	0.35±0.06	0.47±0.07	0.66±0.13	ND	ND	PE(P-18:0/22:4)	0.120634	1.23401	0.994851
PE(P-18:0/22:5)	0.48±0.03	0.40±0.12	0.51±0.06	3.56±0.79	ND	ND	PE(P-18:0/22:5)	0.341106	1.21079	0.994851
PE(P-18:0/22:6)	2.44±0.13	2.36±0.31	3.10±0.23	34.49±4.65	0.77±0.11	1.06±0.34	PE(P-18:0/22:6)	0.724824	1.03161	0.994851
PE(P-18:1/16:0)	ND	ND	ND	ND	ND	ND	PE(P-18:1/16:0)	NA	NA
PE(P-18:1/18:1)	0.14±0.04	0.23±0.18	0.14±0.04	0.22±0.05	ND	ND	PE(P-18:1/18:1)	0.515776	0.632758	0.994851
PE(P-18:1/18:2)	0.60±0.11	0.62±0.26	0.93±0.09	1.12±0.06	0.26±0.00	0.49±0.08	PE(P-18:1/18:2)	0.91686	0.969782	0.994851
PE(P-18:1/20:3)	ND	ND	ND	0.11±0.03	ND	ND	PE(P-18:1/20:3)	NA	NA
PE(P-18:1/20:4)	0.64±0.16	0.43±0.05	0.71±0.07	0.94±0.19	0.75±0.14	1.10±0.24	PE(P-18:1/20:4)	0.141842	1.50436	0.994851
PE(P-18:1/22:4)	0.43±0.10	0.24±0.02	0.40±0.04	0.24±0.05	ND	ND	PE(P-18:1/22:4)	0.0695978	1.79927	0.994851
PE(P-18:1/22:5)	0.34±0.04	0.27±0.07	0.35±0.04	2.10±0.41	ND	ND	PE(P-18:1/22:5)	0.226835	1.26313	0.994851
PE(P-18:1/22:6)	1.19±0.22	0.94±0.17	1.28±0.30	21.79±2.92	ND	0.54±0.39	PE(P-18:1/22:6)	0.19131	1.26903	0.994851
PE(P-18:2/18:2)	ND	ND	ND	0.07±0.02	ND	ND	PE(P-18:2/18:2)	NA	NA
PE(P-18:2/20:4)	ND	ND	ND	0.15±0.03	ND	ND	PE(P-18:2/20:4)	NA	NA
PE(P-18:2/22:6)	ND	ND	ND	2.63±0.23	ND	ND	PE(P-18:2/22:6)	NA	NA
SM(14:0)	0.08±0.01	0.08±0.01	0.10±0.04	0.08±0.00	3.17±0.19	6.38±0.52	SM(14:0)	0.633194	0.925234	0.994851
SM(16:0)	3.07±0.26	2.19±0.13	3.62±0.36	3.73±0.41	30.66±5.65	506.83±57.03	SM(16:0)	0.0138056	1.40212	0.7481
SM(18:0)	0.85±0.05	0.41±0.04	0.92±0.17	1.66±0.19	5.40±1.07	52.70±7.08	SM(18:0)	0.000281657	2.0776	0.119942
SM(18:1)	0.11±0.01	0.10±0.02	0.13±0.01	0.24±0.01	2.27±0.31	298.35±33.02	SM(18:1)	0.544216	1.10701	0.994851
SM(20:0)	1.09±0.12	1.55±0.19	1.70±0.29	4.43±0.54	4.78±1.19	14.77±1.36	SM(20:0)	0.03319	0.703903	0.883439
SM(20:1)	0.16±0.01	0.18±0.01	0.23±0.05	1.39±0.15	1.92±0.55	6.01±0.32	SM(20:1)	0.067283	0.869501	0.994851
SM(22:0)	3.12±0.14	6.21±0.72	5.74±0.74	3.32±0.27	6.82±2.14	12.91±1.66	SM(22:0)	0.0151316	0.502613	0.7481
SM(22:1)	0.89±0.11	1.42±0.10	1.47±0.13	1.30±0.23	5.54±1.26	11.42±0.21	SM(22:1)	0.00410209	0.628339	0.616133
SM(24:0)	2.94±0.10	3.69±0.65	4.20±0.52	1.52±0.19	4.75±1.00	320.95±33.27	SM(24:0)	0.182788	0.797203	0.994851
SM(24:1)	5.06±0.32	4.65±0.39	6.67±0.95	2.24±0.34	11.07±2.04	303.92±26.90	SM(24:1)	0.236219	1.08799	0.994851
SM(26:0)	0.10±0.01	0.13±0.02	0.18±0.05	0.09±0.02	ND	1.89±0.38	SM(26:0)	0.0790065	0.768827	0.994851
SM(26:1)	0.16±0.03	0.14±0.02	0.18±0.04	0.17±0.04	0.19±0.02	1.21±0.30	SM(26:1)	0.437416	1.1388	0.994851
TAG36:0-FA12:0	0.05±0.01	0.04±0.02	0.04±0.01	0.04±0.00	0.09±0.02	0.13±0.00	TAG36:0-FA12:0	0.507272	1.29448	0.994851
TAG38:0-FA12:0	0.03±0.01	0.02±0.01	ND	0.01±0.00	0.07±0.00	0.10±0.02	TAG38:0-FA12:0	0.64076	1.25076	0.994851
TAG40:0-FA12:0	0.02±0.01	ND	ND	0.01±0.00	0.14±0.01	0.14±0.01	TAG40:0-FA12:0	NA	NA
TAG40:0-FA14:0	0.03±0.00	0.03±0.02	0.03±0.01	0.02±0.00	0.13±0.01	0.11±0.01	TAG40:0-FA14:0	0.938	0.968599	0.994851
TAG40:0-FA16:0	0.03±0.00	0.02±0.01	0.03±0.00	0.01±0.00	0.19±0.01	0.18±0.02	TAG40:0-FA16:0	0.653527	1.12926	0.994851
TAG42:0-FA12:0	ND	ND	ND	0.01±0.00	0.22±0.02	0.20±0.02	TAG42:0-FA12:0	NA	NA
TAG42:0-FA14:0	0.03±0.00	0.04±0.02	0.04±0.00	0.02±0.00	0.27±0.02	0.22±0.02	TAG42:0-FA14:0	0.585779	0.796992	0.994851
TAG42:0-FA16:0	0.07±0.02	0.08±0.05	0.07±0.01	0.02±0.00	0.49±0.05	0.43±0.04	TAG42:0-FA16:0	0.660314	0.798462	0.994851
TAG42:1-FA12:0	ND	ND	0.02±0.00	0.01±0.00	0.20±0.02	0.23±0.03	TAG42:1-FA12:0	NA	NA
TAG42:1-FA14:0	ND	0.01±0.01	0.02±0.00	0.01±0.00	0.13±0.01	0.13±0.02	TAG42:1-FA14:0	NA	NA
TAG42:1-FA16:0	0.04±0.02	0.05±0.03	0.05±0.01	0.01±0.00	0.22±0.03	0.25±0.03	TAG42:1-FA16:0	0.689512	0.802632	0.994851
TAG42:1-FA16:1	0.02±0.00	0.03±0.01	ND	ND	0.09±0.01	0.10±0.02	TAG42:1-FA16:1	0.29989	0.6	0.994851
TAG42:1-FA18:1	0.04±0.02	0.03±0.02	0.04±0.01	0.01±0.00	0.25±0.02	0.29±0.04	TAG42:1-FA18:1	0.652048	1.1955	0.994851
TAG42:2-FA12:0	ND	ND	ND	ND	0.06±0.00	ND	TAG42:2-FA12:0	NA	NA
TAG42:2-FA18:2	0.03±0.01	0.03±0.02	0.03±0.00	0.01±0.00	0.10±0.01	0.12±0.00	TAG42:2-FA18:2	0.909933	1.09381	0.994851
TAG44:0-FA12:0	0.03±0.01	0.04±0.01	0.03±0.00	0.02±0.00	0.42±0.04	0.30±0.04	TAG44:0-FA12:0	0.323709	0.705025	0.994851
TAG44:0-FA14:0	0.14±0.09	0.12±0.10	0.12±0.01	0.11±0.01	0.72±0.05	0.57±0.06	TAG44:0-FA14:0	0.829197	1.149	0.994851
TAG44:0-FA16:0	0.14±0.07	0.13±0.09	0.14±0.01	0.09±0.00	1.13±0.07	0.92±0.07	TAG44:0-FA16:0	0.858011	1.10321	0.994851
TAG44:0-FA18:0	0.02±0.00	0.02±0.01	ND	0.01±0.00	0.11±0.01	0.11±0.01	TAG44:0-FA18:0	0.66195	1.16525	0.994851
TAG44:1-FA12:0	0.04±0.02	0.04±0.03	0.04±0.01	0.02±0.00	0.45±0.03	0.42±0.02	TAG44:1-FA12:0	0.958938	1.02741	0.994851
TAG44:1-FA14:0	0.07±0.04	0.06±0.05	0.07±0.00	0.05±0.00	0.47±0.03	0.49±0.06	TAG44:1-FA14:0	0.863129	1.11207	0.994851
TAG44:1-FA14:1	0.02±0.01	ND	ND	0.01±0.00	0.10±0.01	0.14±0.02	TAG44:1-FA14:1	NA	NA
TAG44:1-FA16:0	0.19±0.08	0.21±0.16	0.21±0.02	0.04±0.00	0.75±0.03	0.84±0.11	TAG44:1-FA16:0	0.875551	0.913177	0.994851
TAG44:1-FA16:1	0.05±0.02	0.05±0.04	0.05±0.00	0.03±0.00	0.23±0.02	0.20±0.02	TAG44:1-FA16:1	0.856922	0.907886	0.994851
TAG44:1-FA18:1	0.11±0.04	0.12±0.09	0.14±0.02	0.02±0.00	0.73±0.05	0.82±0.07	TAG44:1-FA18:1	0.874418	0.915084	0.994851
TAG44:2-FA12:0	0.02±0.01	0.02±0.01	0.02±0.00	0.02±0.00	0.15±0.01	0.15±0.02	TAG44:2-FA12:0	1	1	1
TAG44:2-FA14:0	0.02±0.01	0.03±0.02	0.02±0.01	0.01±0.00	0.12±0.01	0.15±0.01	TAG44:2-FA14:0	0.899816	0.91128	0.994851
TAG44:2-FA16:0	0.07±0.03	0.10±0.06	0.09±0.01	0.02±0.00	0.25±0.02	0.27±0.04	TAG44:2-FA16:0	0.61307	0.764174	0.994851
TAG44:2-FA16:1	0.03±0.01	0.05±0.01	0.04±0.01	0.01±0.00	0.10±0.01	0.11±0.01	TAG44:2-FA16:1	0.216255	0.681725	0.994851
TAG44:2-FA18:1	0.05±0.02	0.05±0.03	0.06±0.00	0.02±0.00	0.20±0.01	0.25±0.03	TAG44:2-FA18:1	0.780409	1.12526	0.994851
TAG44:2-FA18:2	0.04±0.02	0.05±0.03	0.05±0.01	0.01±0.00	0.24±0.01	0.27±0.04	TAG44:2-FA18:2	0.805965	0.881764	0.994851
TAG44:3-FA18:2	0.02±0.01	0.03±0.01	0.02±0.00	ND	0.06±0.00	0.09±0.00	TAG44:3-FA18:2	0.786541	0.854512	0.994851
TAG45:0-FA14:0	0.03±0.01	0.03±0.00	0.02±0.01	0.02±0.01	0.12±0.01	0.11±0.00	TAG45:0-FA14:0	0.330331	0.776622	0.994851
TAG45:0-FA15:0	0.02±0.01	0.03±0.01	ND	0.02±0.00	0.10±0.01	ND	TAG45:0-FA15:0	0.259652	0.704981	0.994851
TAG45:0-FA16:0	0.06±0.01	0.07±0.05	0.05±0.01	0.02±0.01	0.17±0.02	0.19±0.04	TAG45:0-FA16:0	0.803382	0.874747	0.994851
TAG45:1-FA15:0	ND	ND	ND	ND	0.07±0.01	0.10±0.01	TAG45:1-FA15:0	NA	NA
TAG45:1-FA16:0	0.10±0.05	0.13±0.11	0.12±0.02	0.01±0.00	0.12±0.01	0.18±0.02	TAG45:1-FA16:0	0.718559	0.78874	0.994851
TAG45:1-FA18:1	0.06±0.02	0.08±0.07	0.08±0.01	0.01±0.00	0.12±0.01	0.14±0.03	TAG45:1-FA18:1	0.660267	0.73189	0.994851
TAG46:0-FA12:0	0.03±0.01	0.03±0.00	0.03±0.00	0.01±0.00	0.26±0.01	0.26±0.03	TAG46:0-FA12:0	0.497922	0.813197	0.994851
TAG46:0-FA14:0	0.68±0.48	0.67±0.58	0.73±0.02	0.43±0.02	1.74±0.10	1.31±0.17	TAG46:0-FA14:0	0.986023	1.01206	0.994851
TAG46:0-FA16:0	1.38±0.91	1.35±1.12	1.48±0.07	0.82±0.04	3.47±0.24	2.86±0.23	TAG46:0-FA16:0	0.974648	1.02091	0.994851
TAG46:0-FA18:0	0.03±0.01	0.04±0.01	0.03±0.00	0.02±0.00	0.30±0.02	0.24±0.03	TAG46:0-FA18:0	0.607921	0.839909	0.994851
TAG46:1-FA12:0	0.21±0.10	0.21±0.15	0.23±0.02	0.05±0.00	1.42±0.11	1.39±0.13	TAG46:1-FA12:0	0.955725	0.970625	0.994851
TAG46:1-FA14:0	0.97±0.57	0.92±0.77	1.09±0.03	0.36±0.00	1.98±0.13	1.73±0.17	TAG46:1-FA14:0	0.942176	1.04652	0.994851
TAG46:1-FA14:1	0.07±0.03	0.09±0.07	0.08±0.01	0.04±0.00	0.24±0.03	0.22±0.01	TAG46:1-FA14:1	0.755322	0.829481	0.994851
TAG46:1-FA16:0	0.99±0.53	1.02±0.81	1.14±0.06	0.37±0.02	2.70±0.19	2.54±0.25	TAG46:1-FA16:0	0.960038	0.970491	0.994851
TAG46:1-FA16:1	0.59±0.31	0.61±0.49	0.67±0.02	0.25±0.01	0.83±0.09	0.74±0.08	TAG46:1-FA16:1	0.938451	0.954385	0.994851
TAG46:1-FA18:0	0.03±0.01	ND	0.03±0.00	0.01±0.00	0.14±0.01	0.14±0.02	TAG46:1-FA18:0	NA	NA
TAG46:1-FA18:1	0.31±0.17	0.28±0.21	0.35±0.02	0.09±0.01	2.35±0.16	2.22±0.26	TAG46:1-FA18:1	0.860281	1.10525	0.994851
TAG46:2-FA12:0	0.15±0.09	0.18±0.16	0.17±0.02	0.05±0.00	0.71±0.06	0.70±0.11	TAG46:2-FA12:0	0.767982	0.809331	0.994851
TAG46:2-FA14:0	0.30±0.18	0.38±0.39	0.37±0.02	0.15±0.01	0.64±0.05	0.59±0.08	TAG46:2-FA14:0	0.769797	0.790716	0.994851
TAG46:2-FA14:1	0.10±0.04	0.10±0.07	0.12±0.01	0.04±0.00	0.24±0.02	0.23±0.01	TAG46:2-FA14:1	0.957734	1.02986	0.994851
TAG46:2-FA16:0	0.23±0.12	0.28±0.23	0.29±0.02	0.08±0.00	0.76±0.06	0.80±0.13	TAG46:2-FA16:0	0.750057	0.815586	0.994851
TAG46:2-FA16:1	0.33±0.13	0.33±0.26	0.41±0.03	0.15±0.01	0.51±0.05	0.52±0.08	TAG46:2-FA16:1	0.990877	1.0063	0.994851
TAG46:2-FA18:1	0.18±0.07	0.15±0.11	0.20±0.03	0.05±0.01	0.89±0.06	0.95±0.06	TAG46:2-FA18:1	0.688856	1.21584	0.994851
TAG46:2-FA18:2	0.16±0.10	0.21±0.21	0.18±0.02	0.07±0.00	0.79±0.06	0.86±0.04	TAG46:2-FA18:2	0.709921	0.739745	0.994851
TAG46:3-FA12:0	0.03±0.02	0.04±0.03	0.04±0.00	0.01±0.00	0.12±0.01	0.14±0.03	TAG46:3-FA12:0	0.753625	0.785782	0.994851
TAG46:3-FA14:0	0.03±0.02	ND	0.03±0.00	0.01±0.00	0.10±0.02	0.13±0.03	TAG46:3-FA14:0	NA	NA
TAG46:3-FA14:1	0.03±0.01	ND	0.03±0.00	0.01±0.00	0.06±0.01	0.08±0.00	TAG46:3-FA14:1	NA	NA
TAG46:3-FA16:0	0.03±0.01	0.04±0.02	0.04±0.00	0.01±0.00	0.10±0.01	0.13±0.02	TAG46:3-FA16:0	0.632641	0.8125	0.994851
TAG46:3-FA16:1	0.05±0.02	0.06±0.05	0.06±0.01	0.02±0.00	0.10±0.01	0.11±0.01	TAG46:3-FA16:1	0.762896	0.81187	0.994851
TAG46:3-FA18:1	0.06±0.03	0.06±0.04	0.07±0.01	0.04±0.00	0.19±0.01	0.20±0.02	TAG46:3-FA18:1	0.926571	1.04739	0.994851
TAG46:3-FA18:2	0.07±0.03	0.07±0.06	0.08±0.01	0.02±0.00	0.25±0.03	0.29±0.03	TAG46:3-FA18:2	0.907745	0.935705	0.994851
TAG46:3-FA18:3	0.02±0.00	ND	ND	ND	0.10±0.01	0.16±0.01	TAG46:3-FA18:3	NA	NA
TAG46:4-FA18:2	0.02±0.01	0.03±0.03	0.03±0.00	0.01±0.00	0.05±0.01	ND	TAG46:4-FA18:2	0.841943	0.817829	0.994851
TAG47:0-FA14:0	0.02±0.01	0.03±0.02	0.03±0.01	0.01±0.01	0.13±0.00	0.11±0.01	TAG47:0-FA14:0	0.73493	0.860728	0.994851
TAG47:0-FA15:0	0.08±0.04	0.10±0.06	0.08±0.01	0.04±0.01	0.26±0.02	0.21±0.01	TAG47:0-FA15:0	0.666777	0.806938	0.994851
TAG47:0-FA16:0	0.17±0.08	0.22±0.15	0.20±0.01	0.08±0.02	0.57±0.04	0.48±0.06	TAG47:0-FA16:0	0.585431	0.738814	0.994851
TAG47:0-FA17:0	0.04±0.01	0.04±0.03	0.05±0.00	0.02±0.00	0.11±0.01	0.13±0.01	TAG47:0-FA17:0	0.816902	1.10503	0.994851
TAG47:1-FA14:0	0.07±0.02	0.08±0.05	0.07±0.01	0.02±0.00	0.28±0.02	0.26±0.02	TAG47:1-FA14:0	0.867214	0.918739	0.994851
TAG47:1-FA15:0	0.08±0.04	0.12±0.09	0.11±0.00	0.02±0.00	0.28±0.03	0.27±0.05	TAG47:1-FA15:0	0.571009	0.692717	0.994851
TAG47:1-FA16:0	0.14±0.05	0.20±0.14	0.18±0.02	0.04±0.00	0.30±0.03	0.31±0.03	TAG47:1-FA16:0	0.506936	0.674942	0.994851
TAG47:1-FA16:1	0.07±0.02	0.09±0.06	0.08±0.01	0.02±0.00	0.13±0.01	0.14±0.03	TAG47:1-FA16:1	0.570899	0.733038	0.994851
TAG47:1-FA17:0	0.02±0.00	0.02±0.01	0.03±0.00	ND	0.07±0.00	0.12±0.03	TAG47:1-FA17:0	0.78454	0.895801	0.994851
TAG47:1-FA18:1	0.06±0.01	0.07±0.05	0.06±0.01	0.02±0.00	0.32±0.03	0.30±0.06	TAG47:1-FA18:1	0.847306	0.910891	0.994851
TAG47:2-FA14:0	0.03±0.01	0.05±0.03	0.04±0.01	0.01±0.00	0.09±0.01	0.12±0.03	TAG47:2-FA14:0	0.526443	0.665702	0.994851
TAG47:2-FA15:0	0.03±0.01	0.05±0.04	0.05±0.00	0.01±0.00	0.09±0.01	0.10±0.02	TAG47:2-FA15:0	0.615857	0.700872	0.994851
TAG47:2-FA16:1	0.05±0.01	0.07±0.05	0.06±0.00	0.01±0.00	0.07±0.01	0.08±0.01	TAG47:2-FA16:1	0.562146	0.723404	0.994851
TAG47:2-FA18:1	0.07±0.02	0.06±0.04	0.07±0.00	0.01±0.00	0.13±0.01	0.16±0.01	TAG47:2-FA18:1	0.963019	1.02237	0.994851
TAG47:2-FA18:2	0.03±0.01	0.05±0.04	0.04±0.00	0.01±0.00	0.10±0.01	0.12±0.03	TAG47:2-FA18:2	0.535199	0.646972	0.994851
TAG48:0-FA14:0	0.63±0.36	0.62±0.45	0.73±0.03	0.16±0.01	1.27±0.08	1.14±0.15	TAG48:0-FA14:0	0.976347	1.01696	0.994851
TAG48:0-FA16:0	8.73±5.57	10.61±7.64	10.62±0.22	3.83±0.13	10.07±0.55	11.63±0.98	TAG48:0-FA16:0	0.748994	0.822496	0.994851
TAG48:0-FA18:0	0.30±0.20	0.27±0.19	0.33±0.02	0.11±0.01	1.06±0.05	0.89±0.09	TAG48:0-FA18:0	0.822117	1.14404	0.994851
TAG48:1-FA12:0	0.04±0.02	0.05±0.00	0.05±0.00	0.01±0.00	0.34±0.02	0.34±0.03	TAG48:1-FA12:0	0.582301	0.825131	0.994851
TAG48:1-FA14:0	5.82±3.11	5.89±4.34	6.82±0.32	0.98±0.04	7.19±0.45	6.76±0.82	TAG48:1-FA14:0	0.983519	0.988419	0.994851
TAG48:1-FA14:1	0.07±0.03	0.06±0.04	0.08±0.00	0.01±0.00	0.18±0.02	0.16±0.05	TAG48:1-FA14:1	0.730147	1.17549	0.994851
TAG48:1-FA16:0	15.19±7.45	17.76±12.80	19.04±0.94	3.16±0.07	12.31±0.93	11.26±1.19	TAG48:1-FA16:0	0.781598	0.855006	0.994851
TAG48:1-FA16:1	4.45±2.02	5.67±4.09	5.80±0.23	1.10±0.01	2.37±0.16	2.05±0.28	TAG48:1-FA16:1	0.675215	0.784599	0.994851
TAG48:1-FA18:0	0.17±0.10	0.14±0.11	0.18±0.01	0.05±0.00	0.58±0.06	0.61±0.11	TAG48:1-FA18:0	0.73767	1.21447	0.994851
TAG48:1-FA18:1	4.87±2.46	4.77±3.52	5.70±0.28	0.80±0.04	9.09±0.66	8.60±0.83	TAG48:1-FA18:1	0.972719	1.01902	0.994851
TAG48:2-FA12:0	0.21±0.10	0.17±0.12	0.23±0.01	0.04±0.00	1.22±0.08	1.19±0.15	TAG48:2-FA12:0	0.666462	1.24682	0.994851
TAG48:2-FA14:0	4.41±2.30	5.49±4.43	5.59±0.16	1.07±0.03	3.77±0.28	3.57±0.35	TAG48:2-FA14:0	0.732841	0.803499	0.994851
TAG48:2-FA14:1	0.60±0.23	0.56±0.42	0.73±0.04	0.08±0.01	1.10±0.08	1.10±0.04	TAG48:2-FA14:1	0.894402	1.07131	0.994851
TAG48:2-FA16:0	5.87±2.66	7.71±5.96	7.65±0.29	1.43±0.07	4.80±0.37	4.59±0.41	TAG48:2-FA16:0	0.661916	0.76169	0.994851
TAG48:2-FA16:1	6.43±2.26	7.64±5.52	8.38±0.30	1.24±0.03	2.70±0.18	2.56±0.15	TAG48:2-FA16:1	0.750811	0.841256	0.994851
TAG48:2-FA18:0	0.03±0.02	0.04±0.04	0.04±0.01	0.02±0.00	0.14±0.01	0.16±0.03	TAG48:2-FA18:0	0.912691	0.892502	0.994851
TAG48:2-FA18:1	2.43±0.96	2.17±1.61	2.93±0.11	0.37±0.01	5.06±0.36	5.12±0.55	TAG48:2-FA18:1	0.826877	1.11808	0.994851
TAG48:2-FA18:2	2.12±1.31	2.87±2.60	2.72±0.09	0.67±0.02	3.02±0.20	3.02±0.29	TAG48:2-FA18:2	0.688274	0.739763	0.994851
TAG48:3-FA12:0	0.13±0.07	0.14±0.13	0.16±0.01	0.04±0.00	0.73±0.05	0.81±0.09	TAG48:3-FA12:0	0.936062	0.948706	0.994851
TAG48:3-FA14:0	0.85±0.38	1.14±1.02	1.15±0.09	0.22±0.01	0.70±0.05	0.71±0.10	TAG48:3-FA14:0	0.681668	0.746847	0.994851
TAG48:3-FA14:1	0.36±0.15	0.37±0.30	0.44±0.03	0.08±0.00	0.43±0.05	0.46±0.06	TAG48:3-FA14:1	0.975243	0.982527	0.994851
TAG48:3-FA16:0	0.43±0.19	0.54±0.44	0.54±0.03	0.11±0.00	0.75±0.06	0.91±0.07	TAG48:3-FA16:0	0.703799	0.786327	0.994851
TAG48:3-FA16:1	1.57±0.55	1.91±1.55	2.18±0.12	0.43±0.01	0.68±0.06	0.70±0.07	TAG48:3-FA16:1	0.749462	0.823044	0.994851
TAG48:3-FA18:1	0.28±0.12	0.27±0.22	0.35±0.01	0.07±0.00	0.96±0.08	1.12±0.08	TAG48:3-FA18:1	0.920015	1.0582	0.994851
TAG48:3-FA18:2	0.85±0.38	1.06±0.92	1.12±0.03	0.21±0.01	1.57±0.10	1.78±0.25	TAG48:3-FA18:2	0.743151	0.803885	0.994851
TAG48:3-FA18:3	0.12±0.06	0.16±0.14	0.15±0.01	0.04±0.00	0.39±0.03	0.46±0.05	TAG48:3-FA18:3	0.665844	0.733529	0.994851
TAG48:4-FA12:0	0.03±0.02	0.06±0.07	0.04±0.01	0.01±0.00	0.20±0.01	0.23±0.03	TAG48:4-FA12:0	0.654625	0.518699	0.994851
TAG48:4-FA14:0	0.06±0.02	0.07±0.06	0.07±0.01	0.01±0.00	0.07±0.00	ND	TAG48:4-FA14:0	0.76381	0.827086	0.994851
TAG48:4-FA14:1	0.06±0.02	0.07±0.06	0.07±0.00	0.02±0.00	0.07±0.01	0.08±0.02	TAG48:4-FA14:1	0.889281	0.907794	0.994851
TAG48:4-FA16:0	0.04±0.01	0.05±0.03	0.05±0.01	0.01±0.00	0.08±0.01	0.14±0.02	TAG48:4-FA16:0	0.50777	0.701731	0.994851
TAG48:4-FA16:1	0.10±0.03	0.12±0.10	0.13±0.01	0.03±0.00	0.09±0.01	0.10±0.01	TAG48:4-FA16:1	0.707921	0.784624	0.994851
TAG48:4-FA18:1	0.04±0.01	0.04±0.03	0.05±0.00	0.01±0.00	0.11±0.01	0.19±0.04	TAG48:4-FA18:1	0.900774	0.944805	0.994851
TAG48:4-FA18:2	0.08±0.04	0.13±0.15	0.12±0.01	0.04±0.00	0.30±0.03	0.37±0.05	TAG48:4-FA18:2	0.632518	0.627165	0.994851
TAG48:4-FA18:3	0.05±0.02	0.07±0.06	0.08±0.01	0.01±0.00	0.20±0.02	0.30±0.04	TAG48:4-FA18:3	0.651724	0.727948	0.994851
TAG48:4-FA20:4	ND	ND	ND	ND	0.05±0.01	ND	TAG48:4-FA20:4	NA	NA
TAG48:5-FA18:2	0.02±0.00	ND	ND	ND	0.03±0.00	ND	TAG48:5-FA18:2	NA	NA
TAG48:5-FA18:3	ND	ND	0.02±0.00	0.01±0.00	0.04±0.00	ND	TAG48:5-FA18:3	NA	NA
TAG49:0-FA15:0	0.07±0.02	0.09±0.06	0.09±0.01	0.01±0.00	0.20±0.01	0.24±0.06	TAG49:0-FA15:0	0.617561	0.76185	0.994851
TAG49:0-FA16:0	0.30±0.11	0.39±0.24	0.37±0.03	0.09±0.01	0.74±0.04	0.70±0.02	TAG49:0-FA16:0	0.605331	0.769331	0.994851
TAG49:0-FA17:0	0.11±0.04	0.14±0.09	0.13±0.01	0.05±0.00	0.31±0.02	0.28±0.04	TAG49:0-FA17:0	0.5752	0.746241	0.994851
TAG49:0-FA18:0	0.04±0.01	0.05±0.03	0.04±0.00	0.01±0.00	0.19±0.01	0.18±0.03	TAG49:0-FA18:0	0.572284	0.770622	0.994851
TAG49:1-FA14:0	0.07±0.02	0.09±0.06	0.10±0.00	0.02±0.00	0.21±0.02	0.24±0.04	TAG49:1-FA14:0	0.743136	0.837254	0.994851
TAG49:1-FA15:0	0.55±0.19	0.75±0.53	0.74±0.02	0.07±0.01	1.08±0.09	1.71±0.20	TAG49:1-FA15:0	0.587344	0.733295	0.994851
TAG49:1-FA16:0	1.19±0.42	1.61±1.09	1.61±0.11	0.15±0.01	1.80±0.13	2.34±0.17	TAG49:1-FA16:0	0.58504	0.739208	0.994851
TAG49:1-FA16:1	0.12±0.04	0.16±0.11	0.16±0.00	0.02±0.00	0.14±0.02	0.13±0.01	TAG49:1-FA16:1	0.612012	0.758242	0.994851
TAG49:1-FA17:0	0.17±0.07	0.19±0.13	0.19±0.01	0.03±0.00	0.30±0.01	0.29±0.04	TAG49:1-FA17:0	0.842357	0.901706	0.994851
TAG49:1-FA18:1	0.51±0.18	0.65±0.43	0.67±0.02	0.07±0.00	1.54±0.13	1.90±0.11	TAG49:1-FA18:1	0.651185	0.789019	0.994851
TAG49:2-FA14:0	0.14±0.04	0.15±0.11	0.16±0.02	0.02±0.00	0.24±0.02	0.22±0.01	TAG49:2-FA14:0	0.79718	0.877569	0.994851
TAG49:2-FA15:0	0.50±0.18	0.76±0.55	0.70±0.02	0.08±0.00	0.58±0.04	0.60±0.04	TAG49:2-FA15:0	0.504069	0.657108	0.994851
TAG49:2-FA16:0	0.64±0.23	1.02±0.70	0.92±0.03	0.10±0.00	0.70±0.08	0.80±0.14	TAG49:2-FA16:0	0.461166	0.632967	0.994851
TAG49:2-FA16:1	0.51±0.15	0.65±0.45	0.67±0.04	0.05±0.00	0.36±0.03	0.39±0.02	TAG49:2-FA16:1	0.658365	0.787485	0.994851
TAG49:2-FA17:0	0.06±0.02	0.08±0.07	0.07±0.00	0.02±0.00	0.10±0.01	0.11±0.02	TAG49:2-FA17:0	0.614063	0.690674	0.994851
TAG49:2-FA18:1	0.40±0.11	0.46±0.32	0.50±0.01	0.04±0.01	0.58±0.04	0.60±0.06	TAG49:2-FA18:1	0.788414	0.873475	0.994851
TAG49:2-FA18:2	0.23±0.11	0.47±0.37	0.37±0.01	0.06±0.00	0.51±0.05	0.49±0.03	TAG49:2-FA18:2	0.391556	0.497149	0.994851
TAG49:3-FA15:0	0.11±0.04	0.19±0.15	0.16±0.01	0.02±0.00	0.10±0.01	0.19±0.01	TAG49:3-FA15:0	0.472501	0.581495	0.994851
TAG49:3-FA16:0	0.07±0.03	0.12±0.08	0.11±0.00	0.01±0.00	0.11±0.02	0.19±0.03	TAG49:3-FA16:0	0.439032	0.624436	0.994851
TAG49:3-FA16:1	0.19±0.06	0.26±0.18	0.27±0.00	0.03±0.00	0.11±0.01	0.19±0.03	TAG49:3-FA16:1	0.558966	0.720626	0.994851
TAG49:3-FA18:2	0.15±0.05	0.23±0.18	0.21±0.02	0.03±0.00	0.17±0.01	0.18±0.02	TAG49:3-FA18:2	0.519136	0.65578	0.994851
TAG49:3-FA18:3	ND	0.03±0.02	0.02±0.00	ND	0.06±0.01	0.07±0.02	TAG49:3-FA18:3	NA	NA
TAG50:0-FA14:0	0.12±0.07	0.11±0.07	0.13±0.01	0.04±0.00	0.21±0.02	0.19±0.03	TAG50:0-FA14:0	0.902921	1.06782	0.994851
TAG50:0-FA16:0	10.74±5.04	13.61±10.95	14.40±0.60	1.50±0.05	8.57±0.55	46.05±2.65	TAG50:0-FA16:0	0.70951	0.789136	0.994851
TAG50:0-FA18:0	2.21±1.20	2.65±1.93	2.84±0.14	0.54±0.00	3.53±0.18	8.38±0.37	TAG50:0-FA18:0	0.7562	0.832922	0.994851
TAG50:1-FA14:0	1.61±0.82	1.44±1.16	1.86±0.08	0.21±0.01	1.57±0.08	1.62±0.13	TAG50:1-FA14:0	0.848236	1.11664	0.994851
TAG50:1-FA16:0	102.74±45.08	131.48±107.65	140.03±6.05	9.75±0.38	46.85±2.82	443.98±23.10	TAG50:1-FA16:0	0.701674	0.781446	0.994851
TAG50:1-FA16:1	5.12±1.82	6.10±5.00	6.77±0.20	0.42±0.03	1.86±0.12	1.84±0.19	TAG50:1-FA16:1	0.774121	0.83923	0.994851
TAG50:1-FA18:0	3.24±1.53	3.36±2.59	3.95±0.13	0.45±0.02	2.60±0.18	2.50±0.20	TAG50:1-FA18:0	0.949027	0.964372	0.994851
TAG50:1-FA18:1	44.30±18.83	54.52±44.90	58.64±2.73	4.21±0.15	28.23±1.92	201.80±10.11	TAG50:1-FA18:1	0.742872	0.812503	0.994851
TAG50:1-FA20:1	0.08±0.04	0.11±0.08	0.11±0.00	0.02±0.00	0.14±0.01	0.15±0.02	TAG50:1-FA20:1	0.574034	0.71825	0.994851
TAG50:2-FA14:0	9.97±3.72	8.87±7.72	11.82±0.50	0.73±0.03	6.45±0.46	6.62±0.57	TAG50:2-FA14:0	0.838178	1.12458	0.994851
TAG50:2-FA14:1	0.08±0.04	0.09±0.02	0.09±0.01	0.02±0.00	0.13±0.01	0.15±0.03	TAG50:2-FA14:1	0.697521	0.867748	0.994851
TAG50:2-FA16:0	91.84±36.95	127.17±91.04	126.69±4.82	10.81±0.46	29.33±2.03	32.97±2.92	TAG50:2-FA16:0	0.582953	0.722169	0.994851
TAG50:2-FA16:1	48.07±15.83	57.86±47.70	63.96±2.35	3.15±0.15	12.31±0.87	12.06±1.25	TAG50:2-FA16:1	0.762874	0.830888	0.994851
TAG50:2-FA18:0	0.84±0.45	0.89±0.67	1.01±0.03	0.22±0.01	0.65±0.05	0.63±0.10	TAG50:2-FA18:0	0.917218	0.94166	0.994851
TAG50:2-FA18:1	59.03±19.94	63.22±53.10	75.19±2.69	3.73±0.22	26.42±1.69	26.59±2.73	TAG50:2-FA18:1	0.907719	0.933816	0.994851
TAG50:2-FA18:2	18.55±9.33	29.30±20.84	26.90±0.96	3.47±0.13	9.60±0.61	11.98±0.95	TAG50:2-FA18:2	0.479095	0.633168	0.994851
TAG50:2-FA20:2	0.03±0.01	0.05±0.03	0.05±0.00	0.01±0.00	0.09±0.01	0.11±0.01	TAG50:2-FA20:2	0.477053	0.663876	0.994851
TAG50:3-FA14:0	5.88±2.29	6.22±4.46	7.38±0.36	0.74±0.04	3.87±0.32	4.14±0.52	TAG50:3-FA14:0	0.914794	0.945854	0.994851
TAG50:3-FA14:1	0.33±0.13	0.24±0.19	0.38±0.02	0.06±0.00	0.39±0.03	0.43±0.08	TAG50:3-FA14:1	0.533754	1.37115	0.994851
TAG50:3-FA16:0	20.91±7.23	28.90±20.24	28.29±1.22	2.26±0.10	6.03±0.42	7.17±0.63	TAG50:3-FA16:0	0.573582	0.723448	0.994851
TAG50:3-FA16:1	28.60±8.67	35.94±25.34	38.85±1.51	2.92±0.13	5.62±0.44	5.92±0.55	TAG50:3-FA16:1	0.673866	0.795804	0.994851
TAG50:3-FA18:0	0.07±0.03	0.08±0.07	0.08±0.01	0.02±0.00	0.10±0.01	0.10±0.02	TAG50:3-FA18:0	0.805835	0.862042	0.994851
TAG50:3-FA18:1	11.20±3.74	11.63±8.47	14.29±0.69	1.32±0.07	5.53±0.39	5.94±0.55	TAG50:3-FA18:1	0.940962	0.962786	0.994851
TAG50:3-FA18:2	19.72±6.62	25.42±17.79	26.30±1.04	2.21±0.09	8.11±0.53	8.74±0.89	TAG50:3-FA18:2	0.644548	0.775602	0.994851
TAG50:3-FA18:3	1.03±0.47	1.46±1.08	1.36±0.05	0.19±0.01	1.15±0.09	1.77±0.13	TAG50:3-FA18:3	0.572304	0.703214	0.994851
TAG50:3-FA20:3	0.04±0.01	0.06±0.04	0.06±0.01	ND	0.13±0.01	0.15±0.03	TAG50:3-FA20:3	0.488217	0.683508	0.994851
TAG50:4-FA14:0	1.18±0.49	1.72±1.47	1.65±0.07	0.26±0.01	1.00±0.08	1.10±0.04	TAG50:4-FA14:0	0.596096	0.684643	0.994851
TAG50:4-FA14:1	0.21±0.08	0.21±0.20	0.25±0.02	0.05±0.00	0.19±0.01	0.23±0.02	TAG50:4-FA14:1	0.985213	1.01236	0.994851
TAG50:4-FA16:0	1.15±0.37	1.56±1.08	1.57±0.07	0.13±0.01	0.56±0.04	0.60±0.05	TAG50:4-FA16:0	0.578253	0.732204	0.994851
TAG50:4-FA16:1	4.31±1.20	5.47±4.01	5.99±0.18	0.55±0.01	0.81±0.06	0.94±0.04	TAG50:4-FA16:1	0.674024	0.789044	0.994851
TAG50:4-FA18:1	0.59±0.20	0.63±0.47	0.75±0.03	0.09±0.01	0.58±0.07	0.69±0.09	TAG50:4-FA18:1	0.893674	0.931605	0.994851
TAG50:4-FA18:2	3.08±1.12	4.29±3.53	4.33±0.21	0.59±0.03	1.46±0.14	1.64±0.18	TAG50:4-FA18:2	0.61849	0.71715	0.994851
TAG50:4-FA18:3	1.15±0.38	1.44±1.01	1.51±0.05	0.12±0.01	0.88±0.07	0.99±0.15	TAG50:4-FA18:3	0.670548	0.793372	0.994851
TAG50:4-FA20:3	0.02±0.00	0.03±0.02	0.03±0.00	ND	0.05±0.01	0.09±0.00	TAG50:4-FA20:3	0.550412	0.721946	0.994851
TAG50:4-FA20:4	0.05±0.01	0.08±0.05	0.07±0.01	0.01±0.00	0.19±0.01	0.19±0.02	TAG50:4-FA20:4	0.397916	0.623365	0.994851
TAG50:5-FA14:0	0.14±0.06	0.22±0.18	0.20±0.00	0.03±0.00	0.13±0.01	0.16±0.02	TAG50:5-FA14:0	0.555737	0.660518	0.994851
TAG50:5-FA16:0	0.10±0.03	0.14±0.10	0.13±0.01	0.02±0.00	0.05±0.00	0.14±0.02	TAG50:5-FA16:0	0.514798	0.685885	0.994851
TAG50:5-FA16:1	0.26±0.08	0.32±0.24	0.35±0.02	0.03±0.00	0.08±0.01	0.10±0.01	TAG50:5-FA16:1	0.742286	0.832248	0.994851
TAG50:5-FA18:1	0.05±0.01	0.06±0.04	0.08±0.00	0.01±0.00	0.06±0.01	0.11±0.01	TAG50:5-FA18:1	0.820283	0.89604	0.994851
TAG50:5-FA18:2	0.19±0.08	0.30±0.29	0.28±0.01	0.05±0.00	0.16±0.01	0.18±0.02	TAG50:5-FA18:2	0.577905	0.636006	0.994851
TAG50:5-FA18:3	0.24±0.07	0.35±0.28	0.35±0.01	0.04±0.00	0.18±0.02	0.22±0.02	TAG50:5-FA18:3	0.577603	0.692041	0.994851
TAG50:5-FA20:4	0.03±0.01	0.04±0.02	0.04±0.01	ND	0.08±0.01	0.12±0.00	TAG50:5-FA20:4	0.513521	0.700717	0.994851
TAG50:5-FA20:5	0.03±0.01	0.03±0.02	0.04±0.00	0.01±0.00	0.05±0.01	0.08±0.00	TAG50:5-FA20:5	0.565498	0.78194	0.994851
TAG50:6-FA20:4	ND	ND	ND	ND	0.02±0.00	ND	TAG50:6-FA20:4	NA	NA
TAG51:0-FA16:0	0.25±0.08	0.32±0.22	0.33±0.02	0.05±0.00	0.36±0.02	0.52±0.08	TAG51:0-FA16:0	0.636651	0.774901	0.994851
TAG51:0-FA17:0	0.13±0.04	0.15±0.10	0.15±0.01	0.02±0.00	0.22±0.02	0.23±0.01	TAG51:0-FA17:0	0.828754	0.897039	0.994851
TAG51:0-FA18:0	0.07±0.02	0.08±0.05	0.09±0.01	0.02±0.00	0.21±0.01	0.22±0.04	TAG51:0-FA18:0	0.850625	0.919	0.994851
TAG51:1-FA15:0	0.18±0.05	0.21±0.16	0.23±0.01	0.01±0.00	0.26±0.03	0.58±0.04	TAG51:1-FA15:0	0.78773	0.864873	0.994851
TAG51:1-FA16:0	1.70±0.52	2.20±1.68	2.28±0.11	0.16±0.01	1.58±0.12	2.07±0.22	TAG51:1-FA16:0	0.663112	0.772653	0.994851
TAG51:1-FA17:0	1.18±0.38	1.46±1.13	1.53±0.04	0.11±0.01	1.18±0.07	1.44±0.12	TAG51:1-FA17:0	0.71324	0.805377	0.994851
TAG51:1-FA18:0	0.26±0.06	0.31±0.23	0.33±0.02	0.03±0.00	0.36±0.02	0.67±0.03	TAG51:1-FA18:0	0.745498	0.837094	0.994851
TAG51:1-FA18:1	1.26±0.41	1.51±1.19	1.65±0.09	0.09±0.01	1.59±0.09	1.96±0.12	TAG51:1-FA18:1	0.754972	0.833157	0.994851
TAG51:2-FA15:0	1.33±0.29	1.41±1.14	1.65±0.08	0.06±0.01	1.09±0.09	1.50±0.15	TAG51:2-FA15:0	0.916967	0.943775	0.994851
TAG51:2-FA16:0	3.96±1.02	4.82±3.62	5.22±0.24	0.41±0.01	2.23±0.13	2.40±0.22	TAG51:2-FA16:0	0.726186	0.822006	0.994851
TAG51:2-FA16:1	0.55±0.15	0.64±0.48	0.73±0.00	0.05±0.00	0.32±0.02	0.33±0.03	TAG51:2-FA16:1	0.777132	0.857816	0.994851
TAG51:2-FA17:0	0.92±0.34	1.26±0.87	1.26±0.11	0.12±0.01	0.63±0.05	0.66±0.04	TAG51:2-FA17:0	0.587422	0.735667	0.994851
TAG51:2-FA18:1	5.23±1.26	5.71±4.68	6.57±0.29	0.32±0.01	3.49±0.23	4.48±0.39	TAG51:2-FA18:1	0.879223	0.916927	0.994851
TAG51:2-FA18:2	0.56±0.19	0.86±0.59	0.78±0.05	0.10±0.00	0.51±0.03	0.55±0.02	TAG51:2-FA18:2	0.47895	0.655652	0.994851
TAG51:3-FA15:0	0.91±0.23	1.17±0.75	1.21±0.07	0.07±0.01	0.66±0.05	1.13±0.15	TAG51:3-FA15:0	0.620111	0.7801	0.994851
TAG51:3-FA16:1	0.76±0.18	0.85±0.64	1.01±0.05	0.06±0.00	0.32±0.03	0.37±0.04	TAG51:3-FA16:1	0.828771	0.890826	0.994851
TAG51:3-FA17:0	0.19±0.06	0.26±0.19	0.26±0.01	0.03±0.00	0.12±0.01	0.16±0.01	TAG51:3-FA17:0	0.585703	0.7207	0.994851
TAG51:3-FA18:2	1.74±0.45	2.31±1.49	2.33±0.13	0.15±0.01	1.09±0.08	1.66±0.06	TAG51:3-FA18:2	0.58803	0.756373	0.994851
TAG51:3-FA18:3	0.03±0.01	0.05±0.03	0.05±0.00	ND	0.06±0.01	0.08±0.01	TAG51:3-FA18:3	0.416836	0.623755	0.994851
TAG51:4-FA15:0	0.21±0.06	0.32±0.22	0.29±0.02	0.03±0.00	0.17±0.02	0.28±0.04	TAG51:4-FA15:0	0.477271	0.645757	0.994851
TAG51:4-FA16:1	0.26±0.06	0.32±0.22	0.36±0.01	0.03±0.00	0.09±0.01	0.12±0.01	TAG51:4-FA16:1	0.671874	0.805607	0.994851
TAG51:4-FA18:2	0.50±0.15	0.75±0.51	0.73±0.03	0.08±0.01	0.31±0.03	0.43±0.05	TAG51:4-FA18:2	0.489468	0.666652	0.994851
TAG51:4-FA18:3	0.12±0.03	0.15±0.09	0.16±0.02	0.01±0.00	0.13±0.01	0.29±0.04	TAG51:4-FA18:3	0.696138	0.830584	0.994851
TAG51:4-FA20:4	0.03±0.00	0.03±0.01	0.04±0.00	ND	0.04±0.00	ND	TAG51:4-FA20:4	0.363513	0.754883	0.994851
TAG51:5-FA18:2	0.05±0.01	0.08±0.06	0.09±0.01	0.02±0.00	0.04±0.00	ND	TAG51:5-FA18:2	0.425706	0.590164	0.994851
TAG51:5-FA18:3	0.04±0.01	0.06±0.04	0.06±0.00	0.01±0.00	0.04±0.01	0.10±0.02	TAG51:5-FA18:3	0.391177	0.623273	0.994851
TAG52:0-FA16:0	2.11±0.90	2.61±2.35	2.85±0.13	0.25±0.02	1.68±0.11	20.88±0.89	TAG52:0-FA16:0	0.754881	0.807247	0.994851
TAG52:0-FA18:0	2.78±1.07	3.03±2.76	3.50±0.16	0.30±0.02	2.51±0.15	25.53±1.61	TAG52:0-FA18:0	0.898098	0.920436	0.994851
TAG52:0-FA20:0	0.14±0.08	0.31±0.23	0.26±0.01	0.05±0.00	0.21±0.01	0.32±0.02	TAG52:0-FA20:0	0.333872	0.466323	0.994851
TAG52:1-FA16:0	41.00±13.92	45.86±44.65	53.37±2.06	2.03±0.14	15.21±0.94	224.95±10.99	TAG52:1-FA16:0	0.871344	0.894022	0.994851
TAG52:1-FA16:1	0.53±0.22	0.63±0.48	0.71±0.03	0.07±0.00	0.23±0.02	0.23±0.03	TAG52:1-FA16:1	0.776126	0.849404	0.994851
TAG52:1-FA18:0	25.56±9.42	28.50±26.87	33.17±1.19	1.71±0.10	12.04±0.72	222.75±15.29	TAG52:1-FA18:0	0.871746	0.896918	0.994851
TAG52:1-FA18:1	54.38±17.68	58.41±58.86	69.54±2.38	2.12±0.16	19.07±1.19	225.94±14.45	TAG52:1-FA18:1	0.918566	0.931045	0.994851
TAG52:1-FA20:0	0.20±0.11	0.47±0.34	0.39±0.01	0.04±0.00	0.15±0.01	0.21±0.01	TAG52:1-FA20:0	0.308155	0.430309	0.994851
TAG52:1-FA20:1	0.57±0.24	1.14±0.88	1.00±0.03	0.10±0.00	0.39±0.02	0.43±0.06	TAG52:1-FA20:1	0.383279	0.504183	0.994851
TAG52:2-FA14:0	0.35±0.14	0.58±0.49	0.59±0.03	0.05±0.00	0.16±0.01	0.15±0.00	TAG52:2-FA14:0	0.504243	0.597975	0.994851
TAG52:2-FA16:0	289.64±86.27	306.15±302.41	369.17±15.29	8.80±0.88	71.10±4.95	326.74±18.67	TAG52:2-FA16:0	0.934813	0.946089	0.994851
TAG52:2-FA16:1	7.92±2.54	7.86±7.03	10.19±0.39	0.54±0.03	1.80±0.13	1.93±0.17	TAG52:2-FA16:1	0.989816	1.00772	0.994851
TAG52:2-FA18:0	14.88±5.65	17.59±12.92	19.34±0.79	1.78±0.07	5.39±0.41	11.13±0.62	TAG52:2-FA18:0	0.763002	0.845909	0.994851
TAG52:2-FA18:1	460.01±133.94	473.46±465.12	578.56±22.17	13.74±1.35	122.44±9.46	594.84±33.77	TAG52:2-FA18:1	0.96541	0.971577	0.994851
TAG52:2-FA18:2	18.06±5.70	22.14±16.39	23.66±0.98	1.57±0.07	6.53±0.42	35.26±2.03	TAG52:2-FA18:2	0.716093	0.815538	0.994851
TAG52:2-FA20:0	0.14±0.05	0.20±0.15	0.20±0.01	0.03±0.00	0.06±0.00	0.16±0.01	TAG52:2-FA20:0	0.54036	0.681531	0.994851
TAG52:2-FA20:1	1.08±0.40	2.01±1.63	1.90±0.05	0.10±0.01	0.36±0.02	0.41±0.08	TAG52:2-FA20:1	0.427519	0.535634	0.994851
TAG52:2-FA20:2	0.30±0.09	0.53±0.40	0.48±0.04	0.04±0.00	0.25±0.02	0.30±0.05	TAG52:2-FA20:2	0.436161	0.57315	0.994851
TAG52:3-FA14:0	0.29±0.08	0.47±0.34	0.47±0.02	0.05±0.01	0.12±0.01	0.18±0.01	TAG52:3-FA14:0	0.46276	0.619282	0.994851
TAG52:3-FA16:0	184.00±48.81	208.32±160.48	233.26±8.73	9.31±0.68	45.57±3.16	331.55±20.59	TAG52:3-FA16:0	0.821845	0.883237	0.994851
TAG52:3-FA16:1	48.32±13.30	45.28±44.15	61.50±2.71	2.12±0.15	7.40±0.54	8.33±0.66	TAG52:3-FA16:1	0.918214	1.06702	0.994851
TAG52:3-FA18:0	2.68±0.93	2.95±2.08	3.34±0.18	0.35±0.01	0.85±0.07	2.38±0.12	TAG52:3-FA18:0	0.853704	0.909586	0.994851
TAG52:3-FA18:1	238.06±61.84	251.58±204.09	300.89±12.14	11.79±0.83	52.03±3.78	284.65±13.90	TAG52:3-FA18:1	0.921172	0.946249	0.994851
TAG52:3-FA18:2	151.28±39.57	173.04±133.04	192.51±6.73	7.97±0.59	40.86±2.89	353.04±19.65	TAG52:3-FA18:2	0.808047	0.874275	0.994851
TAG52:3-FA18:3	1.27±0.31	1.48±1.07	1.60±0.04	0.09±0.00	0.72±0.06	7.56±0.44	TAG52:3-FA18:3	0.768126	0.856639	0.994851
TAG52:3-FA20:0	0.35±0.07	0.39±0.29	0.44±0.01	0.02±0.00	0.10±0.01	0.68±0.01	TAG52:3-FA20:0	0.824979	0.891288	0.994851
TAG52:3-FA20:1	0.34±0.11	0.54±0.38	0.53±0.04	0.06±0.00	0.10±0.01	0.23±0.03	TAG52:3-FA20:1	0.469814	0.633438	0.994851
TAG52:3-FA20:2	0.66±0.16	0.96±0.76	0.99±0.04	0.04±0.00	0.25±0.02	0.54±0.03	TAG52:3-FA20:2	0.567503	0.687271	0.994851
TAG52:3-FA20:3	0.37±0.08	0.67±0.49	0.62±0.05	0.04±0.00	0.38±0.02	1.04±0.06	TAG52:3-FA20:3	0.397384	0.546458	0.994851
TAG52:3-FA22:1	0.11±0.03	0.12±0.09	0.13±0.01	0.01±0.00	0.03±0.00	0.21±0.02	TAG52:3-FA22:1	0.888004	0.926087	0.994851
TAG52:4-FA14:0	0.17±0.05	0.25±0.18	0.28±0.03	0.03±0.00	0.12±0.02	0.20±0.03	TAG52:4-FA14:0	0.482594	0.650681	0.994851
TAG52:4-FA16:0	36.60±10.16	47.94±31.32	48.36±2.13	3.20±0.19	11.53±0.80	78.10±4.10	TAG52:4-FA16:0	0.601937	0.763409	0.994851
TAG52:4-FA16:1	28.49±6.73	28.70±21.26	36.43±1.55	1.82±0.15	3.99±0.29	4.70±0.47	TAG52:4-FA16:1	0.988351	0.992747	0.994851
TAG52:4-FA18:0	0.17±0.05	0.19±0.14	0.22±0.01	0.02±0.00	0.08±0.01	0.16±0.01	TAG52:4-FA18:0	0.839259	0.901188	0.994851
TAG52:4-FA18:1	34.37±8.31	34.79±25.35	43.03±1.62	2.15±0.14	7.18±0.59	61.98±2.98	TAG52:4-FA18:1	0.979955	0.9877	0.994851
TAG52:4-FA18:2	65.39±18.34	83.31±55.49	85.88±3.63	5.98±0.32	16.10±1.16	19.33±1.88	TAG52:4-FA18:2	0.639973	0.784914	0.994851
TAG52:4-FA18:3	11.16±2.74	12.66±9.30	14.14±0.61	0.56±0.04	4.52±0.33	77.68±4.49	TAG52:4-FA18:3	0.810291	0.881377	0.994851
TAG52:4-FA20:0	0.21±0.07	0.28±0.18	0.28±0.02	0.02±0.00	0.07±0.01	0.39±0.03	TAG52:4-FA20:0	0.571217	0.739889	0.994851
TAG52:4-FA20:2	0.16±0.04	0.21±0.15	0.23±0.03	0.02±0.00	0.05±0.01	0.09±0.00	TAG52:4-FA20:2	0.581169	0.737925	0.994851
TAG52:4-FA20:3	0.58±0.10	0.95±0.72	0.93±0.05	0.04±0.00	0.31±0.02	0.38±0.05	TAG52:4-FA20:3	0.469076	0.608211	0.994851
TAG52:4-FA20:4	0.54±0.16	1.03±0.69	0.94±0.03	0.08±0.01	0.65±0.05	1.45±0.03	TAG52:4-FA20:4	0.339357	0.522258	0.994851
TAG52:4-FA22:1	0.10±0.02	0.12±0.08	0.14±0.02	ND	0.03±0.00	0.27±0.02	TAG52:4-FA22:1	0.710789	0.828464	0.994851
TAG52:4-FA22:4	0.03±0.01	0.04±0.03	0.04±0.00	0.01±0.00	0.04±0.00	0.08±0.03	TAG52:4-FA22:4	0.615054	0.784219	0.994851
TAG52:5-FA14:0	0.12±0.02	0.18±0.11	0.19±0.02	0.03±0.00	0.09±0.00	0.14±0.03	TAG52:5-FA14:0	0.447396	0.656755	0.994851
TAG52:5-FA16:0	4.23±1.16	5.81±3.81	5.69±0.25	0.37±0.03	1.48±0.09	1.75±0.18	TAG52:5-FA16:0	0.551629	0.727356	0.994851
TAG52:5-FA16:1	5.78±1.42	7.18±5.25	7.87±0.33	0.54±0.02	1.03±0.09	1.19±0.13	TAG52:5-FA16:1	0.692389	0.803914	0.994851
TAG52:5-FA18:1	2.18±0.49	2.24±1.59	2.80±0.15	0.15±0.01	0.61±0.05	0.81±0.09	TAG52:5-FA18:1	0.952135	0.97147	0.994851
TAG52:5-FA18:2	9.40±2.62	12.63±9.53	12.80±0.48	0.99±0.06	2.05±0.17	2.40±0.21	TAG52:5-FA18:2	0.621816	0.744348	0.994851
TAG52:5-FA18:3	5.86±1.35	7.23±4.80	7.77±0.40	0.42±0.03	1.80±0.14	2.10±0.20	TAG52:5-FA18:3	0.675293	0.810438	0.994851
TAG52:5-FA20:3	0.14±0.02	0.18±0.13	0.21±0.00	0.02±0.00	0.06±0.00	0.09±0.02	TAG52:5-FA20:3	0.578839	0.741585	0.994851
TAG52:5-FA20:4	0.59±0.10	1.14±0.79	1.08±0.07	0.06±0.01	0.45±0.04	0.60±0.08	TAG52:5-FA20:4	0.355149	0.523022	0.994851
TAG52:5-FA20:5	0.18±0.03	0.32±0.19	0.29±0.02	0.04±0.00	0.17±0.01	0.19±0.01	TAG52:5-FA20:5	0.347209	0.577179	0.994851
TAG52:5-FA22:5	0.13±0.03	0.20±0.13	0.19±0.01	0.03±0.00	0.10±0.00	0.14±0.02	TAG52:5-FA22:5	0.448281	0.661711	0.994851
TAG52:6-FA14:0	0.11±0.01	0.17±0.10	0.16±0.00	0.04±0.00	0.05±0.00	0.09±0.00	TAG52:6-FA14:0	0.420544	0.649698	0.994851
TAG52:6-FA16:0	0.37±0.09	0.51±0.32	0.50±0.04	0.05±0.00	0.16±0.01	0.20±0.04	TAG52:6-FA16:0	0.517269	0.716329	0.994851
TAG52:6-FA16:1	0.77±0.17	0.96±0.68	1.07±0.05	0.06±0.00	0.16±0.02	0.20±0.02	TAG52:6-FA16:1	0.673599	0.797974	0.994851
TAG52:6-FA18:1	0.15±0.03	0.16±0.11	0.20±0.01	0.02±0.00	0.06±0.00	0.09±0.02	TAG52:6-FA18:1	0.907866	0.946769	0.994851
TAG52:6-FA18:2	0.72±0.19	0.90±0.65	0.99±0.06	0.07±0.01	0.18±0.01	0.23±0.04	TAG52:6-FA18:2	0.682965	0.79879	0.994851
TAG52:6-FA18:3	0.88±0.20	1.05±0.74	1.18±0.04	0.07±0.01	0.25±0.02	0.34±0.04	TAG52:6-FA18:3	0.729515	0.835729	0.994851
TAG52:6-FA20:4	0.14±0.02	0.23±0.15	0.24±0.01	0.02±0.00	0.09±0.00	0.12±0.03	TAG52:6-FA20:4	0.394374	0.597595	0.994851
TAG52:6-FA20:5	0.31±0.02	0.50±0.35	0.51±0.04	0.02±0.00	0.11±0.01	0.12±0.02	TAG52:6-FA20:5	0.451188	0.623477	0.994851
TAG52:6-FA22:6	0.25±0.06	0.40±0.24	0.37±0.01	0.10±0.00	0.12±0.01	0.18±0.04	TAG52:6-FA22:6	0.403947	0.631858	0.994851
TAG52:7-FA16:0	0.24±0.09	0.31±0.21	0.31±0.01	0.05±0.01	0.35±0.02	0.49±0.07	TAG52:7-FA16:0	0.627338	0.768609	0.994851
TAG52:7-FA18:1	0.10±0.03	0.11±0.08	0.13±0.01	0.01±0.00	0.13±0.01	0.16±0.02	TAG52:7-FA18:1	0.8308	0.893717	0.994851
TAG52:7-FA20:5	0.09±0.00	0.12±0.08	0.14±0.01	0.01±0.00	0.03±0.00	ND	TAG52:7-FA20:5	0.604396	0.76546	0.994851
TAG52:7-FA22:6	0.14±0.02	0.16±0.10	0.18±0.00	0.03±0.00	0.05±0.00	0.22±0.05	TAG52:7-FA22:6	0.725699	0.854979	0.994851
TAG52:8-FA16:1	0.08±0.01	0.10±0.07	0.11±0.01	0.01±0.00	0.05±0.01	ND	TAG52:8-FA16:1	0.653712	0.781282	0.994851
TAG52:8-FA18:2	0.05±0.02	0.08±0.05	0.06±0.00	0.01±0.00	0.05±0.00	ND	TAG52:8-FA18:2	0.349264	0.576955	0.994851
TAG53:0-FA16:0	1.04±0.07	1.70±1.12	1.68±0.09	0.08±0.01	0.16±0.01	0.28±0.02	TAG53:0-FA16:0	0.417471	0.612305	0.994851
TAG53:1-FA16:0	0.62±0.22	0.81±0.61	0.86±0.03	0.07±0.00	0.34±0.02	0.87±0.06	TAG53:1-FA16:0	0.644577	0.758237	0.994851
TAG53:1-FA17:0	0.32±0.10	0.33±0.27	0.38±0.02	0.03±0.00	0.32±0.03	0.35±0.04	TAG53:1-FA17:0	0.958432	0.970674	0.994851
TAG53:1-FA18:0	0.30±0.08	0.33±0.26	0.37±0.01	0.04±0.00	0.35±0.01	0.51±0.06	TAG53:1-FA18:0	0.865788	0.910585	0.994851
TAG53:1-FA18:1	0.79±0.21	0.91±0.76	1.04±0.01	0.07±0.00	0.57±0.03	0.91±0.01	TAG53:1-FA18:1	0.813418	0.868152	0.994851
TAG53:2-FA16:0	1.94±0.61	2.53±2.07	2.72±0.11	0.13±0.01	0.96±0.08	1.90±0.13	TAG53:2-FA16:0	0.676339	0.7669	0.994851
TAG53:2-FA17:0	2.23±0.56	2.07±1.83	2.62±0.15	0.11±0.00	1.27±0.07	1.36±0.16	TAG53:2-FA17:0	0.899596	1.07451	0.994851
TAG53:2-FA18:1	5.49±1.34	5.60±4.94	6.76±0.25	0.37±0.02	3.06±0.22	3.74±0.38	TAG53:2-FA18:1	0.973685	0.980624	0.994851
TAG53:2-FA18:2	0.32±0.09	0.45±0.28	0.44±0.02	0.06±0.00	0.17±0.02	0.26±0.03	TAG53:2-FA18:2	0.535366	0.722907	0.994851
TAG53:3-FA16:0	0.96±0.28	1.34±0.93	1.35±0.05	0.10±0.00	1.74±0.14	3.20±0.32	TAG53:3-FA16:0	0.556763	0.715309	0.994851
TAG53:3-FA17:0	1.51±0.36	1.64±1.10	1.82±0.10	0.13±0.01	0.82±0.07	0.91±0.07	TAG53:3-FA17:0	0.86775	0.924598	0.994851
TAG53:3-FA18:2	1.80±0.45	2.17±1.42	2.30±0.08	0.18±0.01	0.90±0.08	1.17±0.17	TAG53:3-FA18:2	0.705935	0.831182	0.994851
TAG53:4-FA16:0	0.23±0.05	0.33±0.21	0.35±0.02	0.03±0.00	0.70±0.05	1.03±0.10	TAG53:4-FA16:0	0.525586	0.71446	0.994851
TAG53:4-FA17:0	0.32±0.10	0.46±0.33	0.44±0.02	0.05±0.00	0.21±0.02	0.25±0.02	TAG53:4-FA17:0	0.534877	0.687689	0.994851
TAG53:4-FA18:2	1.79±0.38	2.05±1.23	2.25±0.11	0.42±0.02	1.11±0.07	1.36±0.12	TAG53:4-FA18:2	0.755431	0.873802	0.994851
TAG53:4-FA18:3	0.13±0.03	0.17±0.11	0.17±0.02	0.01±0.00	0.10±0.01	0.15±0.03	TAG53:4-FA18:3	0.637485	0.789653	0.994851
TAG53:4-FA20:4	0.03±0.01	0.05±0.02	0.05±0.00	ND	0.04±0.01	ND	TAG53:4-FA20:4	0.306418	0.642672	0.994851
TAG53:5-FA20:4	0.10±0.01	0.16±0.09	0.15±0.02	ND	0.06±0.01	0.23±0.04	TAG53:5-FA20:4	0.383733	0.646658	0.994851
TAG53:6-FA20:4	0.03±0.01	0.06±0.03	0.05±0.01	0.01±0.00	0.02±0.00	ND	TAG53:6-FA20:4	0.264155	0.51802	0.994851
TAG54:0-FA16:0	0.27±0.07	0.71±0.56	0.60±0.03	0.04±0.00	0.14±0.01	0.18±0.04	TAG54:0-FA16:0	0.298649	0.373628	0.994851
TAG54:0-FA18:0	0.36±0.16	0.36±0.27	0.39±0.03	0.11±0.01	0.47±0.02	0.80±0.04	TAG54:0-FA18:0	0.988182	1.00816	0.994851
TAG54:1-FA16:0	1.47±0.60	4.99±4.49	3.98±0.13	0.16±0.01	0.60±0.04	0.73±0.09	TAG54:1-FA16:0	0.306276	0.293864	0.994851
TAG54:1-FA18:0	3.88±1.80	2.95±2.41	4.28±0.23	0.45±0.02	2.65±0.19	3.47±0.28	TAG54:1-FA18:0	0.622186	1.31593	0.994851
TAG54:1-FA18:1	4.08±1.63	5.29±4.64	5.83±0.15	0.43±0.01	2.27±0.14	3.25±0.25	TAG54:1-FA18:1	0.703887	0.771316	0.994851
TAG54:1-FA20:0	1.50±0.64	4.32±3.84	3.45±0.13	0.16±0.01	0.70±0.04	2.51±0.08	TAG54:1-FA20:0	0.33098	0.347421	0.994851
TAG54:1-FA20:1	0.98±0.34	1.87±1.82	1.78±0.05	0.06±0.00	0.24±0.03	0.37±0.04	TAG54:1-FA20:1	0.483211	0.520466	0.994851
TAG54:2-FA16:0	9.62±3.21	19.79±19.05	17.95±0.47	0.45±0.03	1.56±0.09	2.33±0.20	TAG54:2-FA16:0	0.453443	0.485866	0.994851
TAG54:2-FA18:0	20.83±7.19	14.83±12.52	22.42±0.74	1.60±0.08	8.26±0.53	13.07±0.85	TAG54:2-FA18:0	0.520841	1.40435	0.994851
TAG54:2-FA18:1	51.20±16.45	42.58±39.93	59.63±2.01	2.86±0.18	16.14±1.08	25.46±1.60	TAG54:2-FA18:1	0.755002	1.20249	0.994851
TAG54:2-FA18:2	1.71±0.69	2.80±1.85	2.68±0.02	0.31±0.02	0.83±0.02	1.13±0.15	TAG54:2-FA18:2	0.421597	0.61033	0.994851
TAG54:2-FA20:0	0.79±0.33	2.56±1.78	2.01±0.05	0.15±0.00	0.29±0.02	0.54±0.01	TAG54:2-FA20:0	0.224632	0.308258	0.994851
TAG54:2-FA20:1	10.06±3.34	19.20±19.02	18.09±0.51	0.45±0.03	1.58±0.11	2.66±0.26	TAG54:2-FA20:1	0.494339	0.524029	0.994851
TAG54:2-FA20:2	0.50±0.11	0.75±0.70	0.76±0.04	0.02±0.00	0.14±0.00	0.31±0.01	TAG54:2-FA20:2	0.5945	0.66024	0.994851
TAG54:3-FA16:0	8.27±2.04	14.91±12.36	13.92±0.41	0.45±0.04	1.43±0.12	7.42±0.47	TAG54:3-FA16:0	0.45083	0.554282	0.994851
TAG54:3-FA16:1	1.61±0.49	2.68±2.53	2.86±0.09	0.11±0.00	0.18±0.01	0.21±0.01	TAG54:3-FA16:1	0.541113	0.599339	0.994851
TAG54:3-FA18:0	15.65±4.78	13.26±9.21	17.40±0.57	1.82±0.05	5.68±0.35	7.27±0.77	TAG54:3-FA18:0	0.71624	1.18046	0.994851
TAG54:3-FA18:1	239.53±64.52	164.89±156.19	265.99±10.48	9.98±0.66	47.70±3.09	69.79±4.94	TAG54:3-FA18:1	0.506319	1.45265	0.994851
TAG54:3-FA18:2	17.74±5.53	18.29±12.80	21.81±0.85	1.87±0.07	5.51±0.38	6.56±0.59	TAG54:3-FA18:2	0.950709	0.970207	0.994851
TAG54:3-FA18:3	0.17±0.04	0.20±0.13	0.20±0.00	0.05±0.00	0.15±0.02	0.18±0.02	TAG54:3-FA18:3	0.772191	0.872322	0.994851
TAG54:3-FA20:1	5.59±1.62	11.01±8.80	10.06±0.38	0.43±0.03	0.67±0.03	0.82±0.12	TAG54:3-FA20:1	0.398237	0.507851	0.994851
TAG54:3-FA20:2	5.05±1.16	7.53±7.10	7.67±0.30	0.15±0.01	0.93±0.07	3.13±0.14	TAG54:3-FA20:2	0.608537	0.670984	0.994851
TAG54:3-FA20:3	0.60±0.11	0.96±0.83	0.95±0.02	0.03±0.01	0.21±0.01	6.29±0.35	TAG54:3-FA20:3	0.533782	0.625401	0.994851
TAG54:4-FA16:0	5.48±0.86	9.32±7.56	8.90±0.26	0.26±0.03	1.37±0.09	56.74±3.44	TAG54:4-FA16:0	0.471869	0.587969	0.994851
TAG54:4-FA16:1	1.45±0.34	2.06±1.63	2.24±0.05	0.09±0.00	0.16±0.02	0.23±0.02	TAG54:4-FA16:1	0.588023	0.704812	0.994851
TAG54:4-FA18:0	3.41±1.17	4.01±2.97	4.23±0.20	0.70±0.02	1.67±0.10	2.41±0.14	TAG54:4-FA18:0	0.769764	0.850684	0.994851
TAG54:4-FA18:1	137.71±35.35	106.74±77.13	152.39±6.76	9.38±0.55	24.38±1.72	83.35±3.86	TAG54:4-FA18:1	0.575036	1.29012	0.994851
TAG54:4-FA18:2	64.37±17.38	52.70±37.58	72.30±3.28	5.19±0.31	13.12±0.90	20.62±1.54	TAG54:4-FA18:2	0.660971	1.22136	0.994851
TAG54:4-FA18:3	1.51±0.39	1.41±0.98	1.80±0.10	0.13±0.01	0.65±0.04	0.97±0.08	TAG54:4-FA18:3	0.884438	1.06906	0.994851
TAG54:4-FA20:1	0.88±0.23	1.43±1.01	1.42±0.09	0.08±0.01	0.11±0.01	0.19±0.01	TAG54:4-FA20:1	0.451713	0.618416	0.994851
TAG54:4-FA20:2	2.76±0.54	4.00±3.16	4.22±0.14	0.13±0.01	0.40±0.02	1.09±0.09	TAG54:4-FA20:2	0.568119	0.689696	0.994851
TAG54:4-FA20:3	5.52±0.96	8.72±8.10	8.66±0.30	0.16±0.02	1.31±0.10	69.76±3.69	TAG54:4-FA20:3	0.564618	0.632707	0.994851
TAG54:4-FA20:4	0.79±0.10	1.51±1.15	1.35±0.04	0.06±0.01	0.44±0.05	8.94±0.47	TAG54:4-FA20:4	0.394496	0.525105	0.994851
TAG54:4-FA22:1	0.25±0.06	0.21±0.15	0.27±0.01	0.02±0.00	0.05±0.01	0.24±0.02	TAG54:4-FA22:1	0.679525	1.20422	0.994851
TAG54:4-FA22:4	0.11±0.03	0.25±0.16	0.22±0.01	0.03±0.00	0.11±0.01	0.21±0.02	TAG54:4-FA22:4	0.264537	0.450265	0.994851
TAG54:5-FA16:0	3.69±0.43	7.26±5.36	6.58±0.19	0.33±0.03	1.11±0.09	22.47±1.21	TAG54:5-FA16:0	0.368562	0.508761	0.994851
TAG54:5-FA16:1	0.98±0.12	1.32±1.02	1.42±0.07	0.05±0.01	0.15±0.01	0.23±0.03	TAG54:5-FA16:1	0.627054	0.746461	0.994851
TAG54:5-FA18:0	0.50±0.15	0.59±0.41	0.64±0.04	0.08±0.01	0.23±0.03	0.35±0.04	TAG54:5-FA18:0	0.749714	0.847528	0.994851
TAG54:5-FA18:1	30.28±7.66	31.31±23.34	37.00±1.46	3.26±0.18	7.11±0.58	28.25±1.65	TAG54:5-FA18:1	0.947532	0.967027	0.994851
TAG54:5-FA18:2	32.41±10.25	38.17±32.79	40.85±1.41	4.86±0.22	6.76±0.50	8.28±0.79	TAG54:5-FA18:2	0.795056	0.849233	0.994851
TAG54:5-FA18:3	7.38±1.45	6.10±4.50	8.49±0.37	0.39±0.03	2.03±0.18	3.65±0.28	TAG54:5-FA18:3	0.677944	1.21001	0.994851
TAG54:5-FA20:2	0.45±0.08	0.58±0.40	0.62±0.03	0.03±0.00	0.06±0.00	0.11±0.01	TAG54:5-FA20:2	0.63	0.771804	0.994851
TAG54:5-FA20:3	3.21±0.43	4.92±3.89	4.99±0.19	0.16±0.02	0.57±0.05	0.87±0.10	TAG54:5-FA20:3	0.527219	0.652823	0.994851
TAG54:5-FA20:4	5.66±0.55	11.01±8.89	10.34±0.34	0.25±0.03	2.20±0.14	93.88±5.90	TAG54:5-FA20:4	0.406339	0.513864	0.994851
TAG54:5-FA20:5	0.30±0.02	0.49±0.39	0.50±0.02	0.01±0.00	0.09±0.00	0.18±0.04	TAG54:5-FA20:5	0.492834	0.616359	0.994851
TAG54:5-FA22:1	0.16±0.04	0.17±0.12	0.20±0.02	0.02±0.00	0.04±0.01	0.10±0.01	TAG54:5-FA22:1	0.963439	0.977444	0.994851
TAG54:5-FA22:4	0.15±0.02	0.33±0.23	0.29±0.02	0.02±0.00	0.09±0.01	0.12±0.02	TAG54:5-FA22:4	0.299449	0.446386	0.994851
TAG54:5-FA22:5	0.44±0.08	1.09±0.70	0.89±0.04	0.15±0.01	0.25±0.02	0.80±0.04	TAG54:5-FA22:5	0.248135	0.404262	0.994851
TAG54:6-FA16:0	2.53±0.27	5.25±3.70	4.73±0.14	0.35±0.03	0.48±0.04	1.01±0.10	TAG54:6-FA16:0	0.330787	0.481728	0.994851
TAG54:6-FA16:1	0.72±0.06	1.18±0.83	1.19±0.05	0.06±0.01	0.13±0.02	0.18±0.01	TAG54:6-FA16:1	0.438442	0.611281	0.994851
TAG54:6-FA18:1	5.10±0.94	5.32±3.66	6.48±0.24	0.37±0.03	1.15±0.09	1.42±0.09	TAG54:6-FA18:1	0.927364	0.958328	0.994851
TAG54:6-FA18:2	8.04±2.60	13.19±12.40	11.92±0.28	1.89±0.06	2.20±0.14	2.72±0.34	TAG54:6-FA18:2	0.549722	0.60994	0.994851
TAG54:6-FA18:3	4.28±0.92	4.24±3.03	5.21±0.25	0.34±0.01	1.04±0.04	1.28±0.15	TAG54:6-FA18:3	0.983995	1.00958	0.994851
TAG54:6-FA20:3	0.48±0.05	0.63±0.44	0.71±0.03	0.03±0.00	0.08±0.01	0.10±0.01	TAG54:6-FA20:3	0.638316	0.774531	0.994851
TAG54:6-FA20:4	3.59±0.41	6.85±4.84	6.47±0.30	0.24±0.02	0.95±0.07	1.23±0.17	TAG54:6-FA20:4	0.363977	0.524501	0.994851
TAG54:6-FA20:5	2.97±0.16	4.84±3.87	4.89±0.16	0.09±0.01	0.49±0.03	0.85±0.08	TAG54:6-FA20:5	0.491686	0.6146	0.994851
TAG54:6-FA22:5	0.55±0.05	1.17±0.75	1.04±0.04	0.08±0.01	0.16±0.01	0.20±0.01	TAG54:6-FA22:5	0.285199	0.467169	0.994851
TAG54:6-FA22:6	2.09±0.41	5.02±3.43	4.30±0.12	0.62±0.02	0.38±0.02	1.50±0.06	TAG54:6-FA22:6	0.276538	0.416717	0.994851
TAG54:7-FA16:1	0.69±0.04	1.05±0.71	1.15±0.03	0.06±0.01	0.06±0.00	0.09±0.01	TAG54:7-FA16:1	0.470249	0.65384	0.994851
TAG54:7-FA18:1	0.60±0.09	0.63±0.45	0.81±0.03	0.04±0.00	0.16±0.01	0.24±0.04	TAG54:7-FA18:1	0.912032	0.948637	0.994851
TAG54:7-FA18:2	1.66±0.38	2.32±1.66	2.37±0.08	0.19±0.01	0.35±0.03	0.44±0.05	TAG54:7-FA18:2	0.56695	0.716645	0.994851
TAG54:7-FA18:3	0.98±0.24	1.24±0.97	1.31±0.03	0.11±0.01	0.31±0.02	0.43±0.07	TAG54:7-FA18:3	0.694835	0.791308	0.994851
TAG54:7-FA20:4	0.55±0.05	0.81±0.54	0.87±0.03	0.04±0.00	0.13±0.02	0.16±0.03	TAG54:7-FA20:4	0.481505	0.673224	0.994851
TAG54:7-FA20:5	2.36±0.15	3.39±2.40	3.68±0.15	0.09±0.01	0.25±0.02	0.45±0.02	TAG54:7-FA20:5	0.535137	0.696701	0.994851
TAG54:7-FA22:5	0.15±0.01	0.25±0.16	0.26±0.02	0.04±0.00	0.03±0.01	ND	TAG54:7-FA22:5	0.404305	0.602041	0.994851
TAG54:7-FA22:6	3.28±0.22	4.95±3.32	5.16±0.23	0.28±0.02	0.26±0.02	0.40±0.03	TAG54:7-FA22:6	0.476482	0.662621	0.994851
TAG54:8-FA18:2	0.25±0.06	0.32±0.20	0.36±0.03	0.03±0.00	0.05±0.00	0.11±0.00	TAG54:8-FA18:2	0.622739	0.788227	0.994851
TAG54:8-FA18:3	0.16±0.04	0.20±0.14	0.23±0.01	0.02±0.00	0.06±0.01	0.08±0.00	TAG54:8-FA18:3	0.637639	0.775621	0.994851
TAG54:8-FA20:4	0.04±0.01	0.04±0.03	0.05±0.01	ND	0.02±0.00	ND	TAG54:8-FA20:4	0.784841	0.88906	0.994851
TAG54:8-FA20:5	0.35±0.03	0.40±0.27	0.54±0.03	0.02±0.00	0.18±0.01	0.28±0.03	TAG54:8-FA20:5	0.790238	0.882113	0.994851
TAG54:8-FA22:6	0.86±0.08	1.01±0.69	1.28±0.07	0.10±0.01	0.05±0.00	0.08±0.01	TAG54:8-FA22:6	0.734733	0.846561	0.994851
TAG55:1-FA16:0	3.42±0.17	4.95±3.47	5.26±0.12	0.21±0.02	0.13±0.01	0.20±0.02	TAG55:1-FA16:0	0.52549	0.69151	0.994851
TAG55:1-FA18:1	1.09±0.07	1.10±0.89	1.45±0.09	0.06±0.00	0.12±0.01	0.18±0.01	TAG55:1-FA18:1	0.987242	0.991573	0.994851
TAG55:2-FA18:1	0.74±0.21	0.77±0.55	0.95±0.03	0.09±0.01	0.35±0.02	0.51±0.04	TAG55:2-FA18:1	0.94507	0.966313	0.994851
TAG55:2-FA18:2	0.60±0.04	0.65±0.41	0.81±0.05	0.05±0.00	0.04±0.00	0.07±0.00	TAG55:2-FA18:2	0.870853	0.932453	0.994851
TAG55:3-FA18:1	1.78±0.48	1.49±1.11	2.06±0.05	0.18±0.00	0.75±0.05	1.11±0.09	TAG55:3-FA18:1	0.69938	1.2014	0.994851
TAG55:3-FA18:2	0.32±0.07	0.42±0.28	0.42±0.02	0.08±0.00	0.10±0.01	0.17±0.04	TAG55:3-FA18:2	0.608382	0.765561	0.994851
TAG55:4-FA18:1	0.86±0.22	0.81±0.54	1.01±0.05	0.15±0.00	1.20±0.08	1.79±0.18	TAG55:4-FA18:1	0.900488	1.05705	0.994851
TAG55:4-FA18:2	0.53±0.16	0.61±0.43	0.67±0.03	0.11±0.01	0.22±0.02	0.31±0.05	TAG55:4-FA18:2	0.796184	0.874075	0.994851
TAG55:5-FA18:1	0.29±0.05	0.34±0.21	0.38±0.01	0.08±0.00	0.52±0.04	0.76±0.12	TAG55:5-FA18:1	0.742998	0.864193	0.994851
TAG55:5-FA18:2	0.23±0.07	0.32±0.25	0.31±0.01	0.07±0.00	0.35±0.04	0.50±0.09	TAG55:5-FA18:2	0.633798	0.739478	0.994851
TAG55:5-FA20:4	0.09±0.00	0.14±0.09	0.14±0.01	0.01±0.00	0.06±0.01	0.12±0.02	TAG55:5-FA20:4	0.447085	0.656785	0.994851
TAG55:7-FA15:0	0.06±0.01	0.09±0.05	0.09±0.01	0.03±0.01	0.01±0.00	ND	TAG55:7-FA15:0	0.480785	0.683554	0.994851
TAG55:7-FA22:6	0.40±0.02	0.61±0.37	0.65±0.04	0.08±0.00	0.04±0.01	0.26±0.03	TAG55:7-FA22:6	0.435053	0.659333	0.994851
TAG56:10-FA18:2	0.29±0.08	0.40±0.27	0.39±0.00	0.07±0.00	0.09±0.01	0.15±0.02	TAG56:10-FA18:2	0.561541	0.722629	0.994851
TAG56:1-FA16:0	0.08±0.03	0.48±0.34	0.32±0.02	0.02±0.00	0.11±0.01	0.12±0.02	TAG56:1-FA16:0	0.176191	0.157177	0.994851
TAG56:1-FA18:1	0.30±0.13	0.71±0.54	0.63±0.02	0.07±0.00	0.19±0.01	0.20±0.04	TAG56:1-FA18:1	0.321376	0.43001	0.994851
TAG56:2-FA16:0	0.25±0.09	1.61±1.20	1.11±0.06	0.04±0.01	0.18±0.01	0.21±0.03	TAG56:2-FA16:0	0.188838	0.157731	0.994851
TAG56:2-FA18:0	0.78±0.26	1.04±0.88	1.14±0.05	0.12±0.00	0.23±0.01	0.25±0.03	TAG56:2-FA18:0	0.661703	0.746037	0.994851
TAG56:2-FA20:0	0.85±0.39	1.60±1.43	1.52±0.07	0.17±0.01	0.37±0.02	0.49±0.06	TAG56:2-FA20:0	0.461834	0.531236	0.994851
TAG56:2-FA20:1	1.13±0.37	1.39±1.26	1.61±0.10	0.15±0.01	0.31±0.01	0.34±0.02	TAG56:2-FA20:1	0.763902	0.815823	0.994851
TAG56:3-FA16:0	0.23±0.07	1.10±0.71	0.80±0.03	0.03±0.00	0.11±0.01	0.15±0.03	TAG56:3-FA16:0	0.164001	0.205603	0.994851
TAG56:3-FA18:0	0.82±0.21	0.99±0.70	1.14±0.04	0.13±0.01	0.19±0.01	0.29±0.03	TAG56:3-FA18:0	0.722172	0.827936	0.994851
TAG56:3-FA18:1	10.34±3.05	12.32±11.99	14.65±0.60	0.75±0.04	1.40±0.10	1.58±0.18	TAG56:3-FA18:1	0.804822	0.839108	0.994851
TAG56:3-FA18:2	0.78±0.30	1.94±1.24	1.60±0.04	0.23±0.00	0.24±0.02	0.23±0.01	TAG56:3-FA18:2	0.244742	0.402382	0.994851
TAG56:3-FA20:0	0.56±0.26	1.30±0.86	1.14±0.02	0.20±0.01	0.23±0.01	0.29±0.01	TAG56:3-FA20:0	0.269713	0.429484	0.994851
TAG56:3-FA20:1	6.42±1.88	7.34±7.10	8.99±0.25	0.46±0.02	0.86±0.05	0.98±0.12	TAG56:3-FA20:1	0.846275	0.874729	0.994851
TAG56:3-FA20:2	0.55±0.09	0.54±0.47	0.67±0.05	0.04±0.00	0.12±0.01	0.15±0.02	TAG56:3-FA20:2	0.974399	1.01843	0.994851
TAG56:4-FA16:0	0.45±0.08	1.06±0.88	0.89±0.02	0.02±0.00	0.12±0.01	0.23±0.05	TAG56:4-FA16:0	0.354249	0.425182	0.994851
TAG56:4-FA18:0	0.86±0.12	1.07±0.83	1.20±0.06	0.08±0.01	0.27±0.00	0.37±0.04	TAG56:4-FA18:0	0.705808	0.803972	0.994851
TAG56:4-FA18:1	8.25±1.67	8.59±6.88	10.80±0.42	0.67±0.05	0.95±0.08	1.31±0.08	TAG56:4-FA18:1	0.940953	0.960655	0.994851
TAG56:4-FA18:2	3.19±0.84	4.19±2.90	4.60±0.09	0.53±0.03	0.38±0.02	0.40±0.06	TAG56:4-FA18:2	0.616349	0.761616	0.994851
TAG56:4-FA20:1	4.03±1.10	4.86±3.44	5.59±0.13	0.56±0.02	0.45±0.03	0.54±0.09	TAG56:4-FA20:1	0.721244	0.828139	0.994851
TAG56:4-FA20:2	2.80±0.56	2.27±2.12	3.34±0.17	0.13±0.01	0.31±0.02	0.45±0.01	TAG56:4-FA20:2	0.711602	1.23313	0.994851
TAG56:4-FA20:3	0.87±0.13	0.95±0.82	1.18±0.04	0.06±0.00	0.23±0.02	0.41±0.06	TAG56:4-FA20:3	0.878358	0.913851	0.994851
TAG56:4-FA20:4	0.21±0.03	0.27±0.20	0.28±0.02	0.03±0.00	0.16±0.00	0.23±0.04	TAG56:4-FA20:4	0.677893	0.791229	0.994851
TAG56:4-FA22:4	0.14±0.01	0.31±0.22	0.27±0.01	0.01±0.00	0.05±0.00	0.10±0.01	TAG56:4-FA22:4	0.32264	0.455419	0.994851
TAG56:5-FA16:0	1.19±0.14	2.75±2.18	2.43±0.07	0.09±0.01	0.35±0.03	0.47±0.04	TAG56:5-FA16:0	0.340656	0.432903	0.994851
TAG56:5-FA18:0	0.78±0.09	1.03±0.76	1.13±0.02	0.10±0.01	0.36±0.02	0.47±0.06	TAG56:5-FA18:0	0.623137	0.753263	0.994851
TAG56:5-FA18:1	6.01±0.70	6.29±5.07	7.99±0.24	0.37±0.02	1.03±0.08	3.09±0.23	TAG56:5-FA18:1	0.933344	0.955824	0.994851
TAG56:5-FA18:2	2.35±0.43	3.00±1.93	3.24±0.12	0.48±0.00	0.28±0.03	0.37±0.06	TAG56:5-FA18:2	0.618771	0.781496	0.994851
TAG56:5-FA20:1	0.88±0.21	1.36±0.93	1.31±0.09	0.24±0.01	0.13±0.00	0.16±0.01	TAG56:5-FA20:1	0.469123	0.647991	0.994851
TAG56:5-FA20:2	1.72±0.23	1.46±1.03	2.03±0.06	0.14±0.01	0.16±0.02	0.22±0.04	TAG56:5-FA20:2	0.70326	1.18067	0.994851
TAG56:5-FA20:3	3.14±0.41	2.61±2.37	3.72±0.12	0.16±0.01	0.46±0.04	1.71±0.13	TAG56:5-FA20:3	0.73857	1.20269	0.994851
TAG56:5-FA20:4	1.58±0.13	1.89±1.54	2.22±0.08	0.09±0.01	0.83±0.09	1.22±0.11	TAG56:5-FA20:4	0.758727	0.833994	0.994851
TAG56:5-FA22:4	1.27±0.12	2.99±2.43	2.61±0.11	0.06±0.01	0.37±0.03	0.58±0.10	TAG56:5-FA22:4	0.343944	0.424331	0.994851
TAG56:5-FA22:5	0.48±0.05	1.07±0.80	0.89±0.02	0.07±0.01	0.14±0.00	0.63±0.06	TAG56:5-FA22:5	0.328321	0.44645	0.994851
TAG56:6-FA16:0	3.06±0.27	6.79±5.01	6.02±0.15	0.31±0.02	0.62±0.04	3.22±0.17	TAG56:6-FA16:0	0.326832	0.451379	0.994851
TAG56:6-FA18:0	0.45±0.05	0.68±0.49	0.70±0.01	0.08±0.01	0.15±0.01	0.62±0.08	TAG56:6-FA18:0	0.507783	0.666977	0.994851
TAG56:6-FA18:1	5.04±0.34	7.22±5.53	7.65±0.22	0.45±0.03	1.05±0.08	3.82±0.34	TAG56:6-FA18:1	0.564742	0.697505	0.994851
TAG56:6-FA18:2	2.05±0.24	2.61±1.64	2.90±0.14	0.31±0.01	0.32±0.04	0.47±0.06	TAG56:6-FA18:2	0.620585	0.788335	0.994851
TAG56:6-FA18:3	0.27±0.02	0.34±0.21	0.39±0.02	0.03±0.00	0.04±0.00	0.08±0.01	TAG56:6-FA18:3	0.637659	0.799065	0.994851
TAG56:6-FA20:2	0.41±0.08	0.46±0.28	0.52±0.03	0.06±0.00	0.06±0.00	ND	TAG56:6-FA20:2	0.816034	0.903949	0.994851
TAG56:6-FA20:3	2.05±0.18	1.79±1.30	2.43±0.07	0.21±0.01	0.22±0.02	0.31±0.03	TAG56:6-FA20:3	0.765744	1.1434	0.994851
TAG56:6-FA20:4	3.25±0.25	3.37±2.79	4.35±0.11	0.22±0.02	1.01±0.10	2.95±0.18	TAG56:6-FA20:4	0.947524	0.964382	0.994851
TAG56:6-FA20:5	0.35±0.03	0.33±0.28	0.44±0.01	0.02±0.00	0.11±0.01	0.26±0.04	TAG56:6-FA20:5	0.896393	1.07202	0.994851
TAG56:6-FA22:4	0.88±0.08	1.90±1.30	1.71±0.05	0.07±0.01	0.16±0.00	0.24±0.05	TAG56:6-FA22:4	0.30822	0.466198	0.994851
TAG56:6-FA22:5	4.53±0.42	9.52±7.27	8.57±0.23	0.38±0.02	0.88±0.07	5.21±0.21	TAG56:6-FA22:5	0.35656	0.476114	0.994851
TAG56:6-FA22:6	2.95±0.29	4.61±3.70	4.73±0.17	0.28±0.03	0.22±0.02	10.64±0.58	TAG56:6-FA22:6	0.52005	0.640358	0.994851
TAG56:7-FA16:0	7.05±0.46	11.20±8.66	11.33±0.36	0.47±0.05	0.41±0.05	21.02±1.28	TAG56:7-FA16:0	0.494574	0.629916	0.994851
TAG56:7-FA16:1	0.49±0.05	0.72±0.57	0.78±0.03	0.04±0.01	0.04±0.00	0.09±0.01	TAG56:7-FA16:1	0.548195	0.671723	0.994851
TAG56:7-FA18:0	0.14±0.01	0.17±0.12	0.20±0.01	0.02±0.00	0.05±0.01	0.14±0.02	TAG56:7-FA18:0	0.749275	0.848783	0.994851
TAG56:7-FA18:1	5.99±0.40	8.26±6.69	8.99±0.24	0.36±0.03	0.44±0.03	17.84±1.18	TAG56:7-FA18:1	0.616193	0.725092	0.994851
TAG56:7-FA18:2	2.12±0.17	3.33±2.05	3.29±0.10	0.39±0.01	0.33±0.02	0.48±0.08	TAG56:7-FA18:2	0.414098	0.636828	0.994851
TAG56:7-FA18:3	0.23±0.01	0.29±0.19	0.32±0.02	0.03±0.01	0.05±0.00	0.10±0.01	TAG56:7-FA18:3	0.6378	0.788283	0.994851
TAG56:7-FA20:3	0.49±0.04	0.55±0.35	0.63±0.00	0.10±0.01	0.07±0.01	0.13±0.01	TAG56:7-FA20:3	0.814485	0.901784	0.994851
TAG56:7-FA20:4	2.14±0.24	2.30±1.54	2.81±0.11	0.24±0.02	0.46±0.04	0.64±0.09	TAG56:7-FA20:4	0.878283	0.932355	0.994851
TAG56:7-FA20:5	1.78±0.16	1.40±1.19	2.25±0.06	0.06±0.01	0.24±0.01	0.42±0.03	TAG56:7-FA20:5	0.638567	1.27051	0.994851
TAG56:7-FA22:4	0.15±0.01	0.26±0.18	0.26±0.01	0.02±0.00	0.03±0.00	ND	TAG56:7-FA22:4	0.396666	0.572113	0.994851
TAG56:7-FA22:5	3.39±0.11	6.28±4.19	5.96±0.19	0.37±0.03	0.35±0.03	1.16±0.09	TAG56:7-FA22:5	0.353999	0.539127	0.994851
TAG56:7-FA22:6	30.02±2.20	44.13±35.79	46.15±1.52	1.35±0.17	1.26±0.08	116.31±6.22	TAG56:7-FA22:6	0.565273	0.68016	0.994851
TAG56:8-FA16:0	3.91±0.25	5.60±3.98	5.92±0.16	0.25±0.02	0.15±0.01	0.26±0.02	TAG56:8-FA16:0	0.537827	0.697497	0.994851
TAG56:8-FA16:1	1.14±0.13	1.19±1.03	1.61±0.05	0.05±0.01	0.03±0.00	0.06±0.00	TAG56:8-FA16:1	0.94594	0.961585	0.994851
TAG56:8-FA18:1	1.26±0.11	1.24±1.00	1.67±0.08	0.07±0.00	0.14±0.01	0.22±0.03	TAG56:8-FA18:1	0.9758	1.016	0.994851
TAG56:8-FA18:2	3.30±0.15	4.45±3.06	5.00±0.19	0.29±0.02	0.15±0.02	0.22±0.04	TAG56:8-FA18:2	0.581524	0.741036	0.994851
TAG56:8-FA18:3	0.21±0.01	0.30±0.18	0.30±0.01	0.03±0.01	0.05±0.01	ND	TAG56:8-FA18:3	0.495195	0.704931	0.994851
TAG56:8-FA20:4	0.62±0.07	0.74±0.41	0.87±0.06	0.15±0.00	0.17±0.02	0.29±0.04	TAG56:8-FA20:4	0.659957	0.836323	0.994851
TAG56:8-FA20:5	1.40±0.10	1.14±0.79	1.78±0.06	0.08±0.01	0.21±0.01	0.37±0.05	TAG56:8-FA20:5	0.637989	1.22054	0.994851
TAG56:8-FA22:5	0.66±0.04	0.97±0.68	1.03±0.03	0.07±0.01	0.06±0.01	0.10±0.02	TAG56:8-FA22:5	0.51579	0.683289	0.994851
TAG56:8-FA22:6	22.98±0.49	29.69±21.77	33.06±1.52	1.18±0.11	0.52±0.05	0.77±0.11	TAG56:8-FA22:6	0.646507	0.773744	0.994851
TAG56:9-FA18:3	0.22±0.02	0.29±0.19	0.34±0.02	0.02±0.00	0.02±0.00	ND	TAG56:9-FA18:3	0.567658	0.740041	0.994851
TAG56:9-FA20:4	0.11±0.02	0.14±0.09	0.17±0.02	0.01±0.00	0.03±0.00	ND	TAG56:9-FA20:4	0.549693	0.748442	0.994851
TAG56:9-FA20:5	0.36±0.04	0.38±0.22	0.52±0.03	0.04±0.01	0.36±0.04	0.57±0.04	TAG56:9-FA20:5	0.890362	0.94735	0.994851
TAG56:9-FA22:6	3.44±0.05	3.62±2.75	4.72±0.15	0.18±0.02	0.09±0.01	0.17±0.01	TAG56:9-FA22:6	0.919315	0.949728	0.994851
TAG57:10-FA22:6	ND	ND	0.02±0.00	ND	ND	ND	TAG57:10-FA22:6	NA	NA
TAG57:2-FA18:1	2.15±0.09	1.53±1.19	2.47±0.07	0.23±0.02	0.09±0.01	0.16±0.03	TAG57:2-FA18:1	0.466126	1.39965	0.994851
TAG57:3-FA18:2	0.66±0.06	0.61±0.36	0.82±0.03	0.21±0.01	0.03±0.01	ND	TAG57:3-FA18:2	0.824961	1.08758	0.994851
TAG58:10-FA18:2	0.73±0.10	0.67±0.39	0.91±0.04	0.23±0.02	0.03±0.00	0.07±0.02	TAG58:10-FA18:2	0.811938	1.09301	0.994851
TAG58:10-FA20:4	0.26±0.01	0.45±0.36	0.47±0.02	0.05±0.00	0.03±0.00	ND	TAG58:10-FA20:4	0.447876	0.572829	0.994851
TAG58:10-FA20:5	0.11±0.01	0.16±0.11	0.18±0.01	0.02±0.00	0.04±0.01	0.10±0.01	TAG58:10-FA20:5	0.522944	0.690737	0.994851
TAG58:10-FA22:5	0.11±0.01	0.14±0.11	0.17±0.02	0.03±0.00	0.02±0.01	ND	TAG58:10-FA22:5	0.668834	0.78883	0.994851
TAG58:10-FA22:6	2.93±0.21	2.58±1.79	3.67±0.20	0.59±0.03	0.09±0.01	0.16±0.02	TAG58:10-FA22:6	0.767753	1.1352	0.994851
TAG58:2-FA18:1	0.11±0.04	0.50±0.37	0.37±0.02	0.04±0.00	0.19±0.02	0.19±0.02	TAG58:2-FA18:1	0.210064	0.222126	0.994851
TAG58:3-FA18:1	0.31±0.10	1.11±0.93	0.90±0.02	0.09±0.01	0.29±0.03	0.30±0.03	TAG58:3-FA18:1	0.275887	0.283324	0.994851
TAG58:5-FA18:1	0.43±0.09	0.59±0.48	0.67±0.01	0.06±0.00	0.08±0.01	0.13±0.01	TAG58:5-FA18:1	0.628233	0.732876	0.994851
TAG58:6-FA16:0	0.25±0.03	0.54±0.38	0.49±0.00	0.03±0.00	0.05±0.00	0.09±0.00	TAG58:6-FA16:0	0.322601	0.462016	0.994851
TAG58:6-FA18:0	0.28±0.03	0.35±0.25	0.40±0.03	0.08±0.00	0.05±0.00	0.12±0.00	TAG58:6-FA18:0	0.661915	0.79346	0.994851
TAG58:6-FA18:1	1.08±0.13	1.39±1.15	1.57±0.09	0.13±0.00	0.15±0.01	0.21±0.05	TAG58:6-FA18:1	0.686276	0.777629	0.994851
TAG58:6-FA20:4	0.15±0.01	0.26±0.20	0.26±0.01	0.02±0.00	0.03±0.01	ND	TAG58:6-FA20:4	0.41771	0.564099	0.994851
TAG58:6-FA22:4	0.57±0.06	0.69±0.58	0.82±0.04	0.07±0.00	0.08±0.01	0.14±0.02	TAG58:6-FA22:4	0.768507	0.8339	0.994851
TAG58:6-FA22:5	0.43±0.04	0.61±0.45	0.64±0.02	0.11±0.01	0.08±0.01	0.15±0.01	TAG58:6-FA22:5	0.564149	0.705469	0.994851
TAG58:7-FA16:0	0.50±0.05	1.02±0.69	0.95±0.04	0.04±0.00	0.04±0.00	0.09±0.01	TAG58:7-FA16:0	0.320744	0.491312	0.994851
TAG58:7-FA18:0	0.52±0.08	0.53±0.41	0.66±0.03	0.10±0.00	0.05±0.01	0.09±0.01	TAG58:7-FA18:0	0.966512	0.978942	0.994851
TAG58:7-FA18:1	2.47±0.29	2.69±2.18	3.40±0.17	0.34±0.02	0.15±0.01	0.34±0.03	TAG58:7-FA18:1	0.877125	0.917513	0.994851
TAG58:7-FA18:2	0.46±0.04	0.66±0.44	0.72±0.05	0.14±0.00	0.05±0.00	0.10±0.01	TAG58:7-FA18:2	0.508898	0.696826	0.994851
TAG58:7-FA20:4	0.18±0.03	0.25±0.17	0.28±0.02	0.04±0.00	0.03±0.00	ND	TAG58:7-FA20:4	0.539843	0.712085	0.994851
TAG58:7-FA22:4	0.40±0.05	0.53±0.38	0.59±0.01	0.09±0.01	0.04±0.01	ND	TAG58:7-FA22:4	0.6244	0.762025	0.994851
TAG58:7-FA22:5	2.03±0.24	2.03±1.65	2.64±0.16	0.29±0.02	0.16±0.02	0.29±0.03	TAG58:7-FA22:5	0.997882	1.00141	0.999213
TAG58:7-FA22:6	2.78±0.30	2.67±2.33	3.62±0.21	0.36±0.04	0.16±0.01	0.45±0.02	TAG58:7-FA22:6	0.946751	1.03807	0.994851
TAG58:8-FA18:1	5.13±0.55	3.59±3.23	5.89±0.32	0.44±0.04	0.14±0.01	0.86±0.05	TAG58:8-FA18:1	0.496425	1.42968	0.994851
TAG58:8-FA18:2	1.11±0.08	1.31±0.87	1.52±0.05	0.35±0.02	0.05±0.01	0.12±0.02	TAG58:8-FA18:2	0.72717	0.845733	0.994851
TAG58:8-FA20:3	0.12±0.01	0.18±0.14	0.20±0.01	0.03±0.00	0.02±0.00	ND	TAG58:8-FA20:3	0.544913	0.678961	0.994851
TAG58:8-FA20:4	0.23±0.02	0.27±0.19	0.31±0.01	0.03±0.01	0.04±0.00	0.10±0.01	TAG58:8-FA20:4	0.737838	0.849365	0.994851
TAG58:8-FA22:5	1.58±0.08	1.64±1.13	2.12±0.07	0.41±0.02	0.09±0.00	0.14±0.01	TAG58:8-FA22:5	0.937032	0.96444	0.994851
TAG58:8-FA22:6	14.89±1.72	9.93±9.11	16.83±0.75	0.88±0.06	0.37±0.03	2.30±0.09	TAG58:8-FA22:6	0.445538	1.50031	0.994851
TAG58:9-FA18:1	2.43±0.07	1.67±1.31	2.78±0.09	0.26±0.01	0.09±0.00	0.18±0.03	TAG58:9-FA18:1	0.42511	1.44975	0.994851
TAG58:9-FA18:2	2.00±0.05	1.54±1.12	2.38±0.07	0.43±0.03	0.04±0.00	0.08±0.01	TAG58:9-FA18:2	0.553278	1.29616	0.994851
TAG58:9-FA20:4	0.20±0.02	0.34±0.24	0.38±0.01	0.04±0.01	0.05±0.00	0.11±0.04	TAG58:9-FA20:4	0.416176	0.595902	0.994851
TAG58:9-FA22:5	0.48±0.03	0.59±0.37	0.68±0.02	0.23±0.02	0.04±0.01	0.09±0.02	TAG58:9-FA22:5	0.663134	0.816652	0.994851
TAG58:9-FA22:6	11.59±0.27	8.07±6.46	12.97±0.62	1.14±0.08	0.20±0.01	0.33±0.02	TAG58:9-FA22:6	0.445471	1.43569	0.994851
TAG60:10-FA22:5	0.14±0.00	0.27±0.19	0.28±0.01	0.10±0.01	0.02±0.00	ND	TAG60:10-FA22:5	0.379667	0.532629	0.994851
TAG60:10-FA22:6	0.88±0.08	0.95±0.81	1.23±0.04	0.19±0.02	0.02±0.00	ND	TAG60:10-FA22:6	0.908717	0.935709	0.994851
TAG60:11-FA22:5	0.25±0.01	0.47±0.39	0.49±0.02	0.10±0.01	ND	ND	TAG60:11-FA22:5	0.423175	0.52062	0.994851
TAG60:11-FA22:6	1.07±0.04	1.56±1.29	1.78±0.06	0.32±0.04	0.02±0.00	ND	TAG60:11-FA22:6	0.579527	0.687496	0.994851
TAG60:12-FA22:6	2.07±0.15	2.86±2.68	3.35±0.16	0.40±0.03	0.02±0.00	ND	TAG60:12-FA22:6	0.658978	0.722858	0.994851
